# Supplementary material for: Oligonucleotide synthesis under mild deprotection conditions
Source: Royal Society of Chemistry journal article supplement (doi:10.1039/d2nj03845e), 2023-01-01
Supplement: d2nj03845e2.pdf [file d2nj03845e2.pdf]

Electronic Supporting Information (ESI) for *New Journal of Chemistry*

## Oligonucleotide synthesis under mild deprotection conditions

Komal Chillar<sup>1,2,+</sup>, Adikari M. D. N. Eriyagama<sup>1,2,+</sup>, Yipeng Yin<sup>1,2,+</sup>, Shahien Shahsavari<sup>1,2,+</sup>, Bhaskar Halami<sup>1,1</sup>, Alexander Apostle<sup>1,2</sup>, Shiyue Fang<sup>1,2,\*</sup>

<sup>1</sup> Department of Chemistry, Michigan Technological University, 1400 Townsend Drive, Houghton, MI, 49931, USA

<sup>2</sup> Health Research Institute, Michigan Technological University, 1400 Townsend Drive, Houghton, MI, 49931, USA

+ Equal contributors

\* To whom correspondence should be addressed. Tel: 1-906-487-2023; Fax: 1-906-487-2061; Email: shifang@mtu.edu

### Table of Contents

|                                                                |              |
|----------------------------------------------------------------|--------------|
| <u>HPLC profiles of ODNs</u>                                   | <u>2-20</u>  |
| <u>MALDI MS and OD<sub>260</sub> values of ODNs</u>            | <u>21-32</u> |
| <u>Capillary electrophoresis profiles of ODNs</u>              | <u>33-35</u> |
| <u>An example trityl assay log for ODN synthesis</u>           | <u>36-36</u> |
| <u>Image of gel electrophoresis analysis of ODN <b>29j</b></u> | <u>37-37</u> |

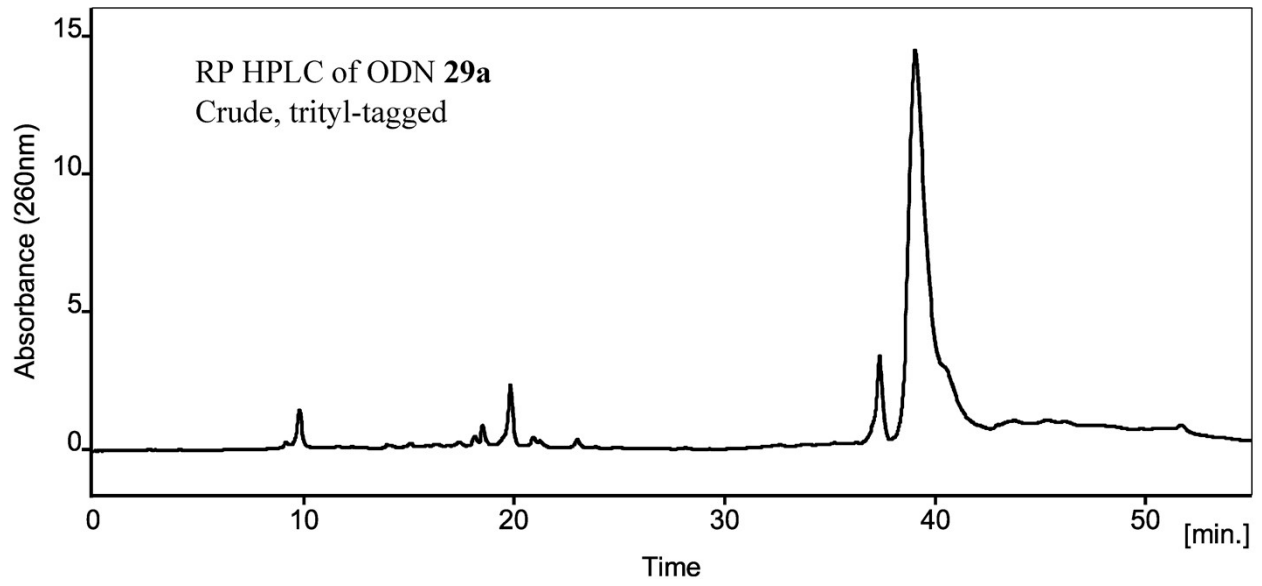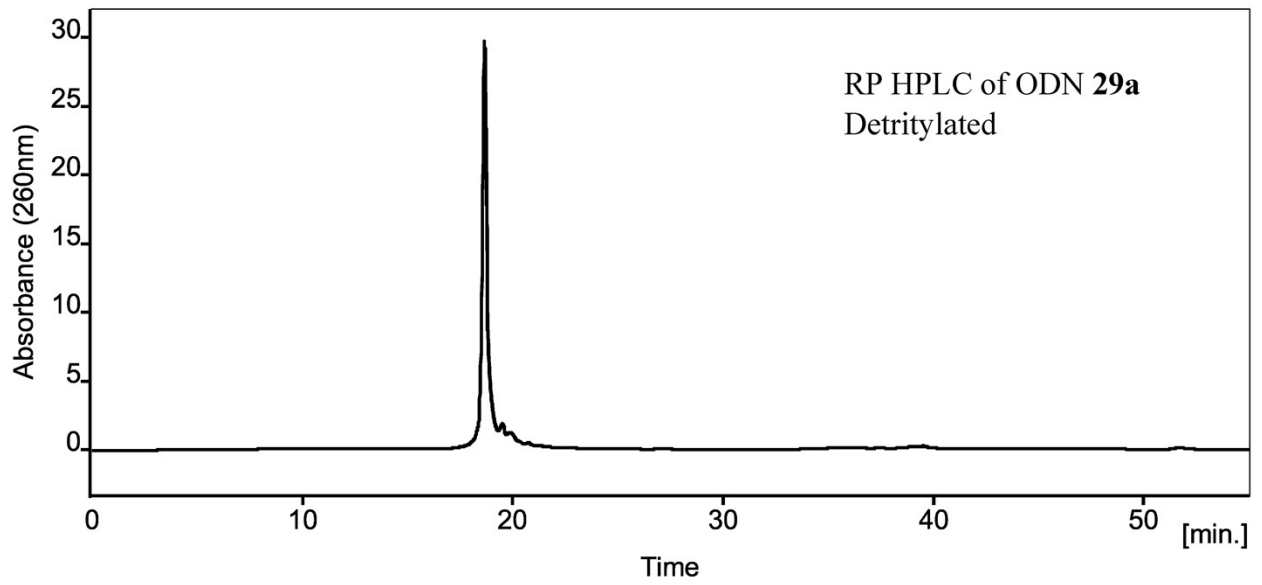

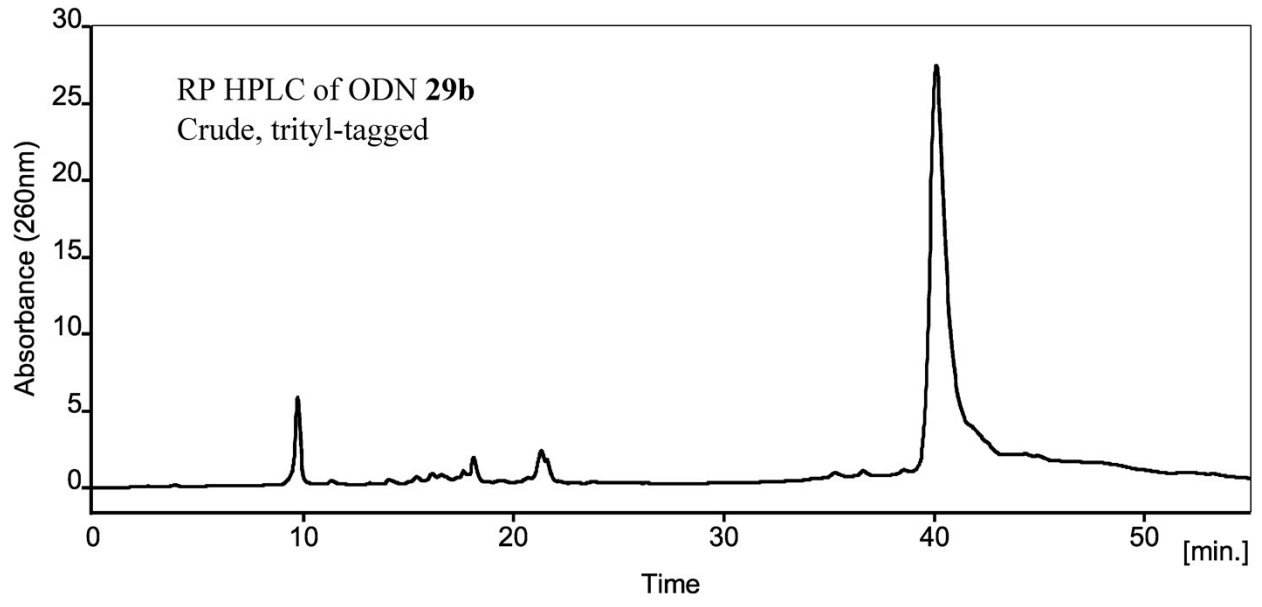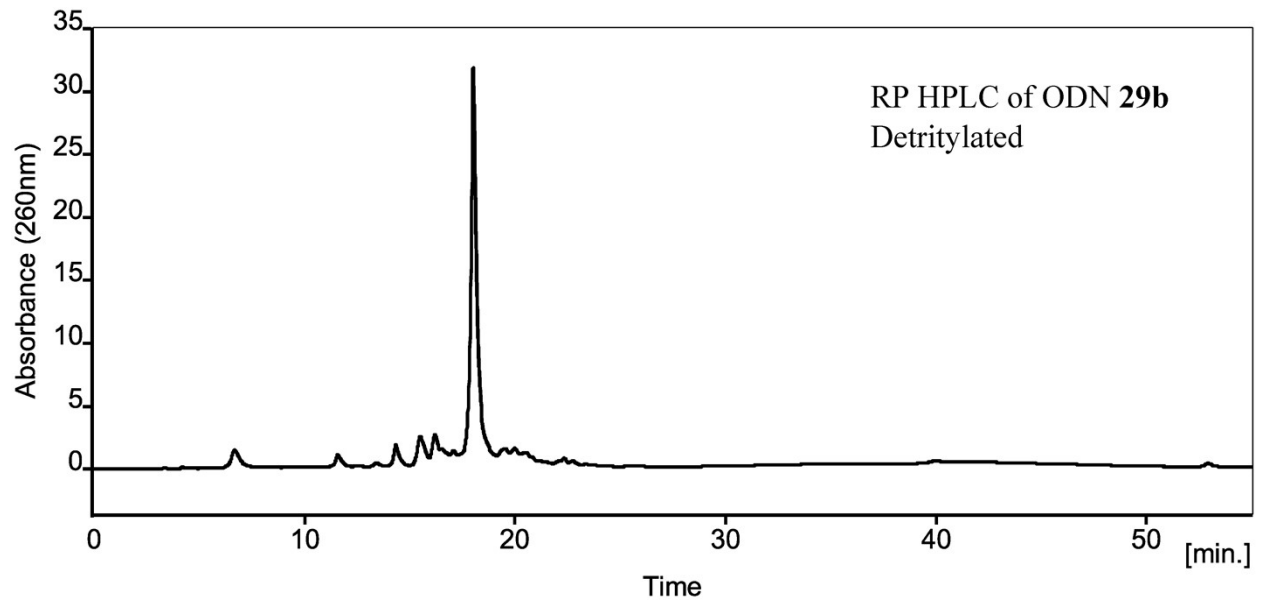

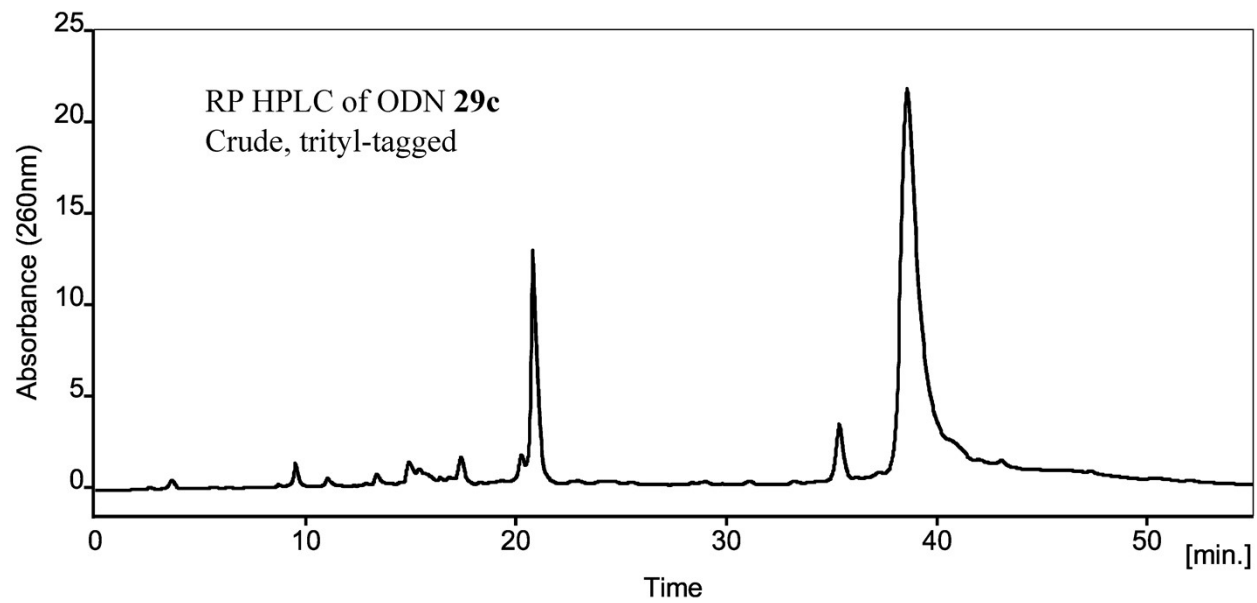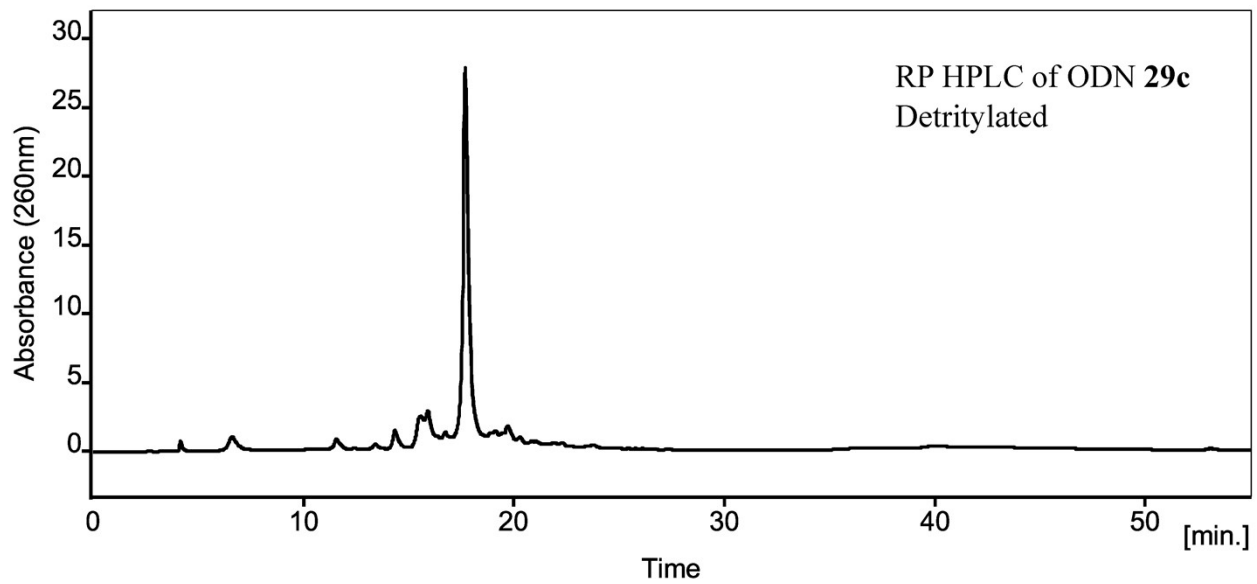

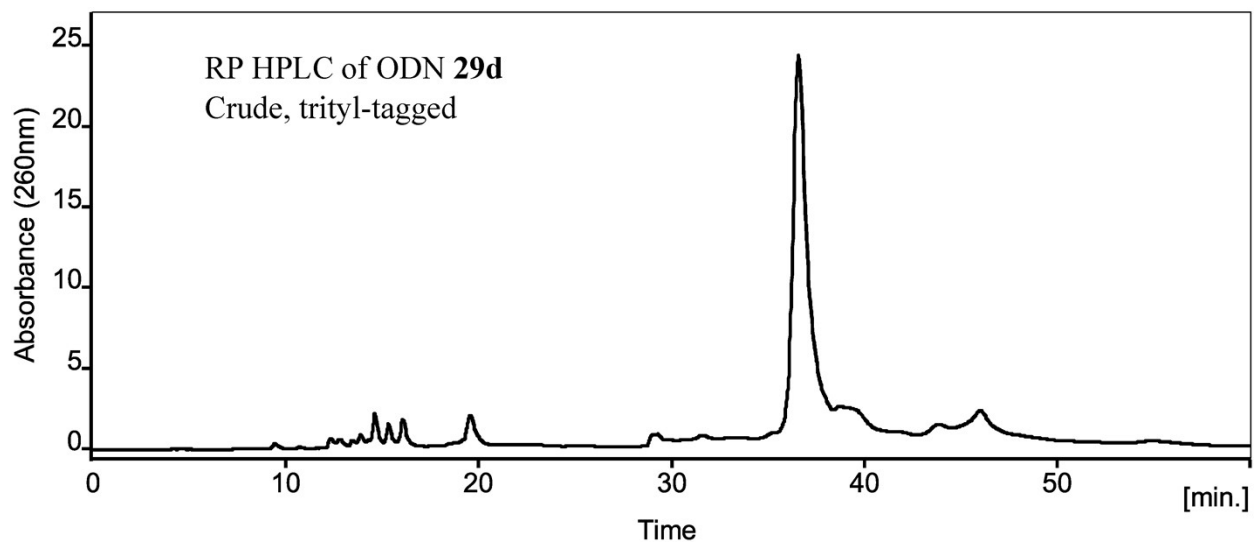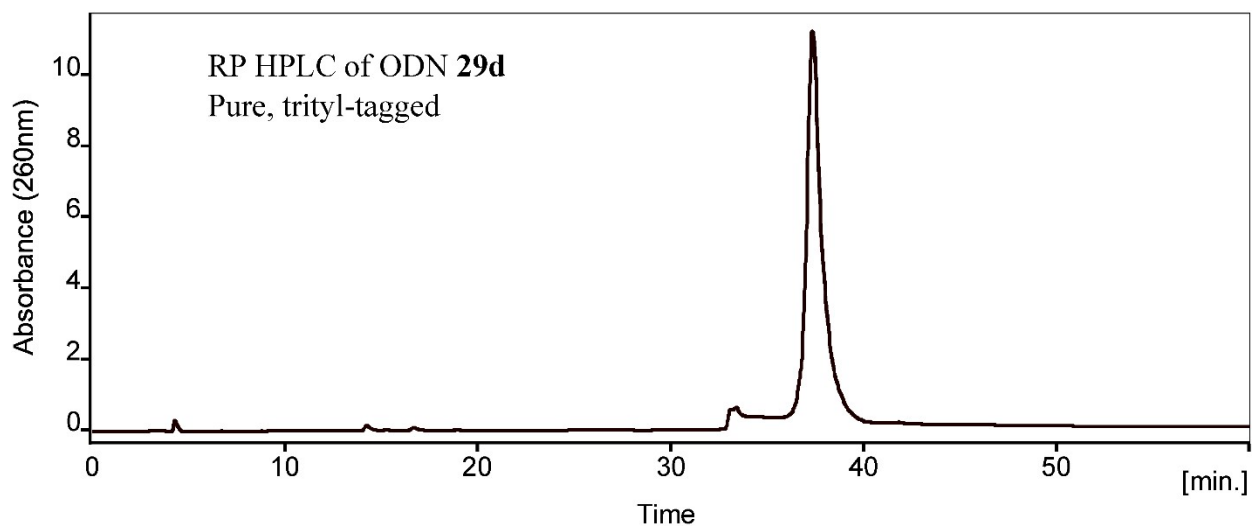

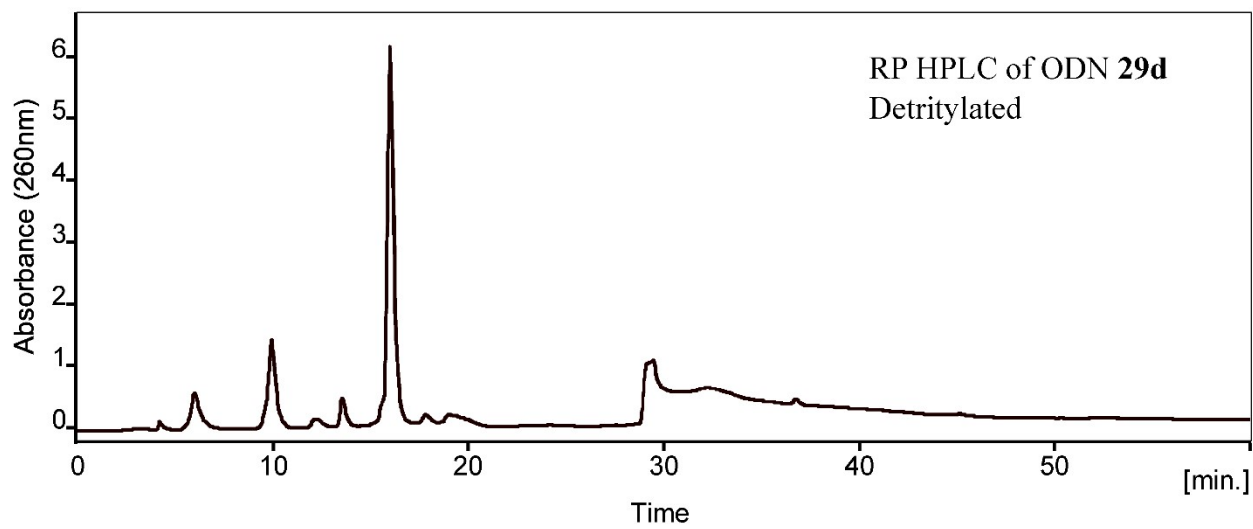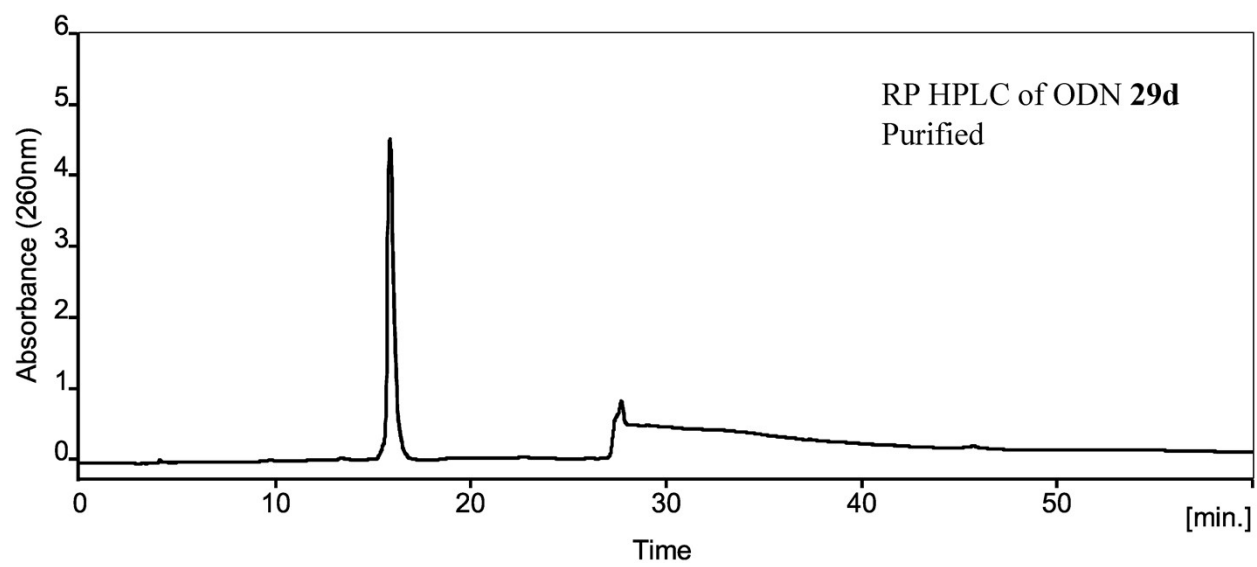

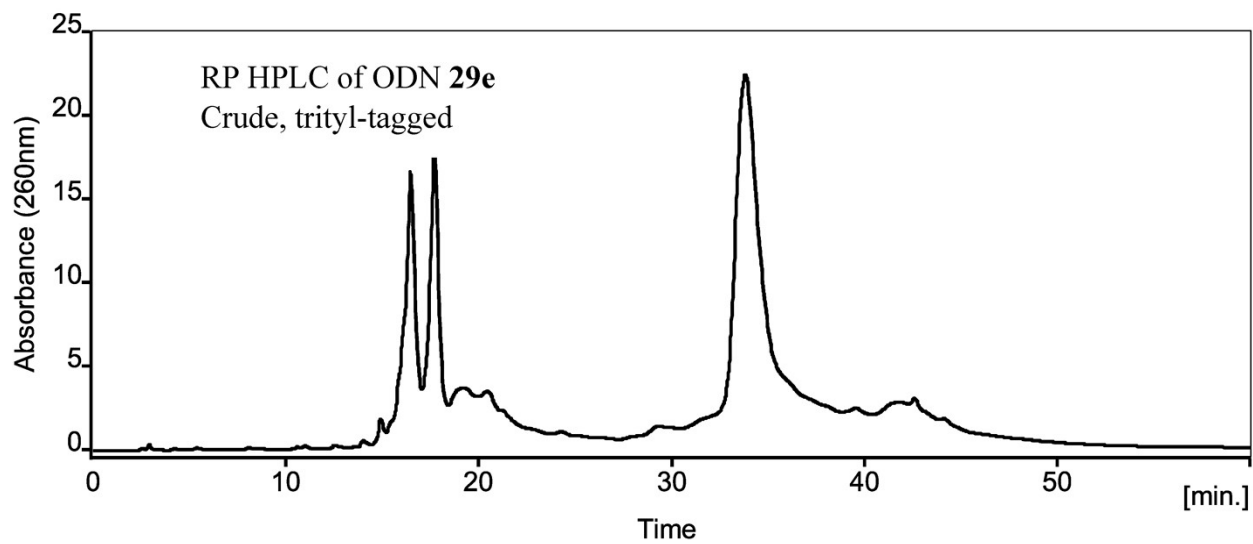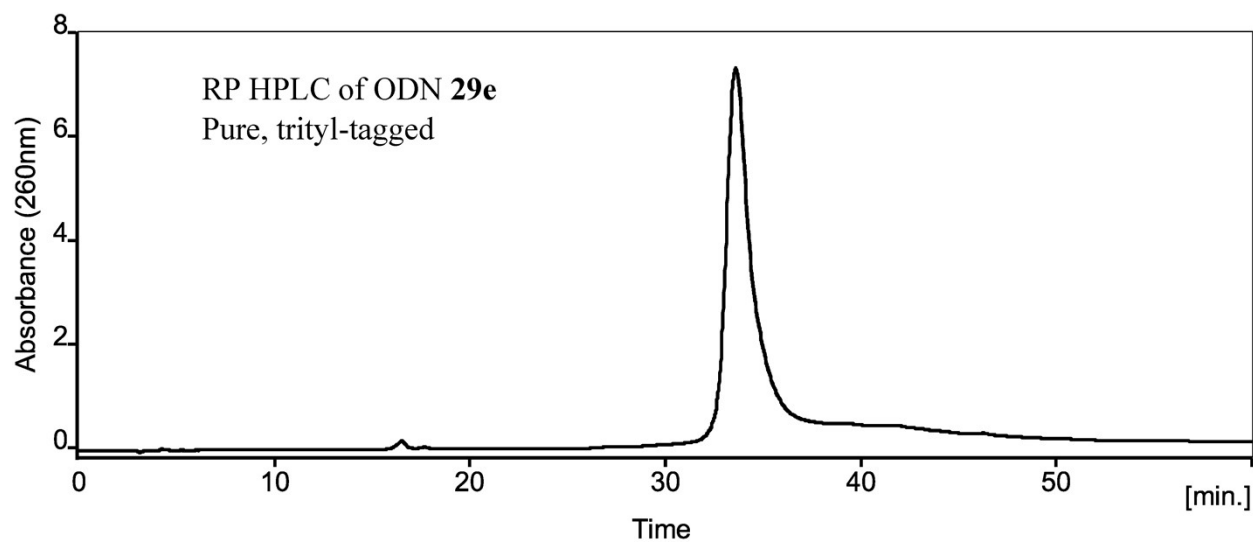

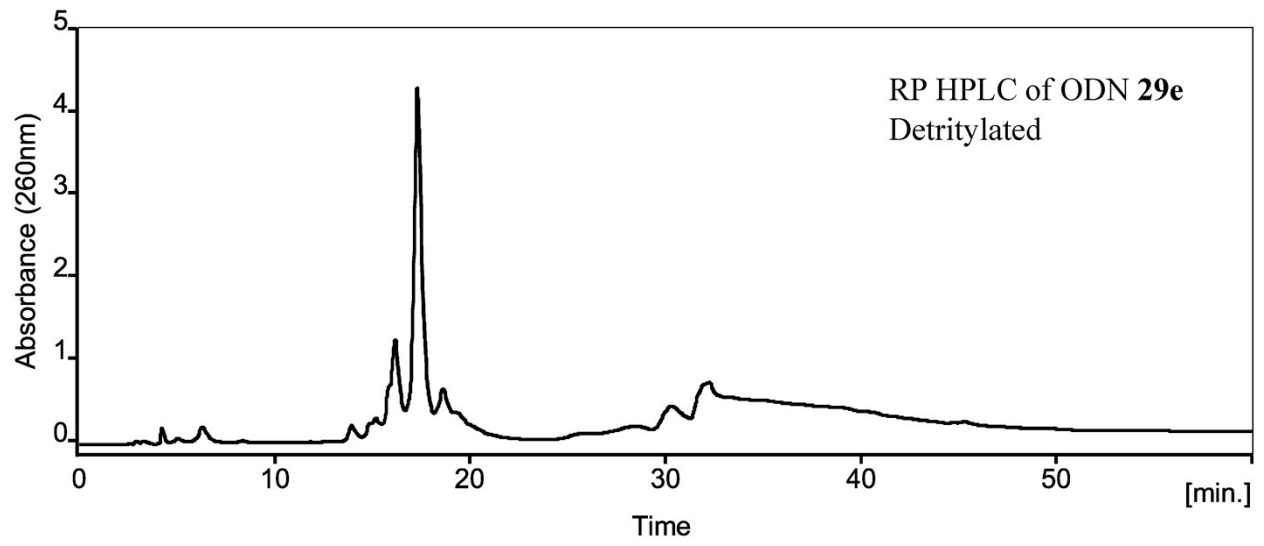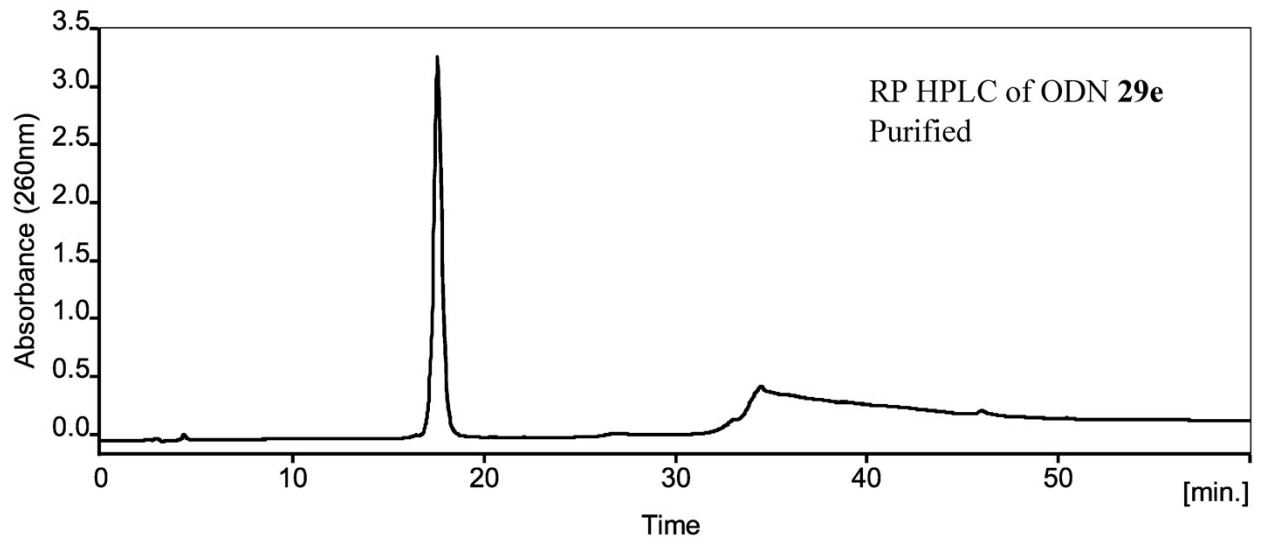



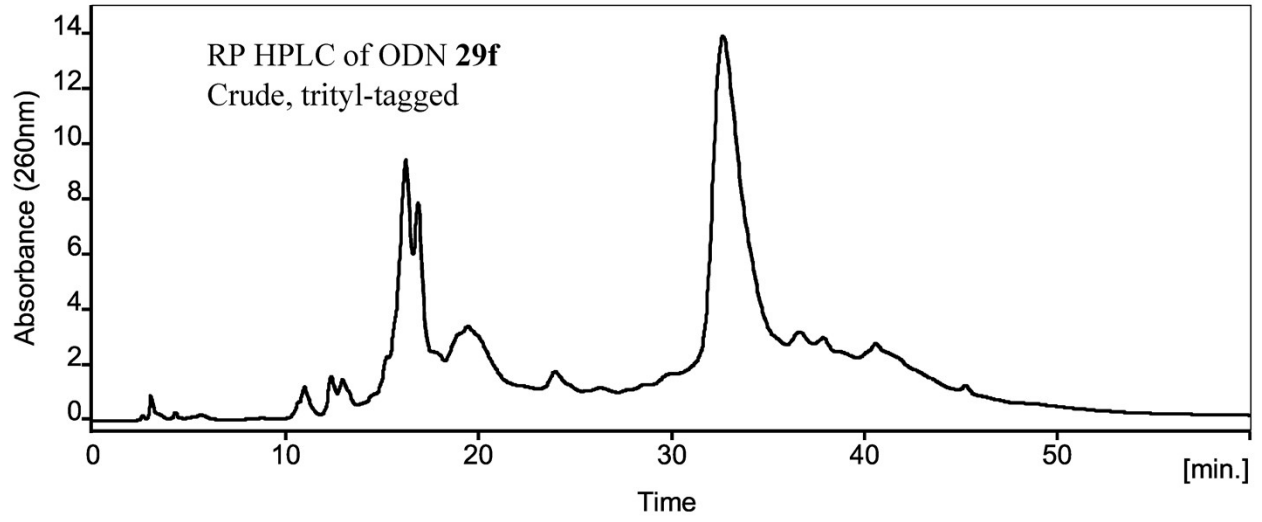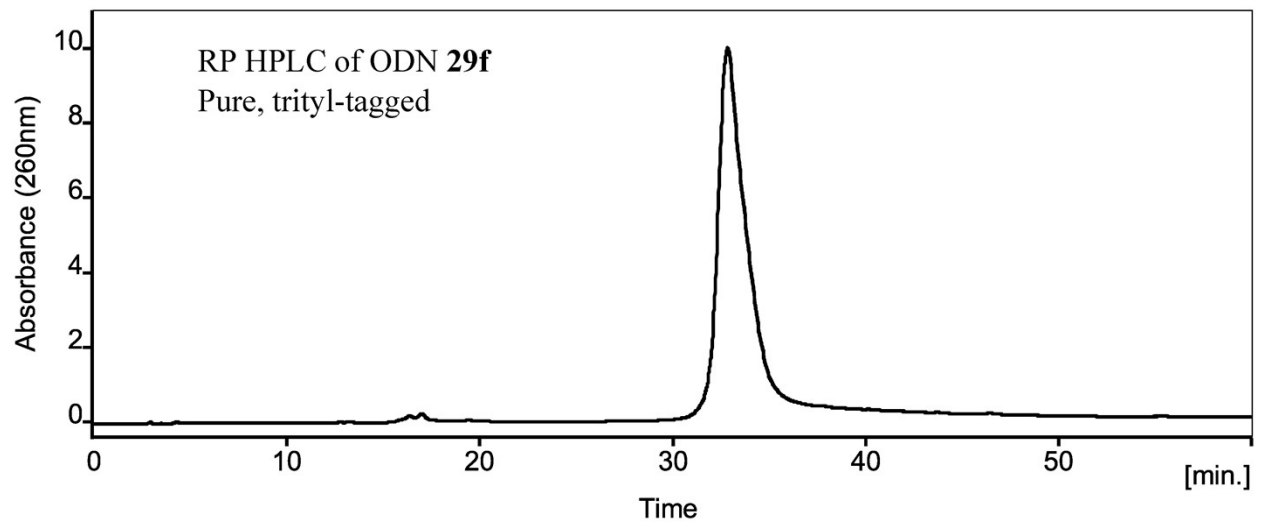

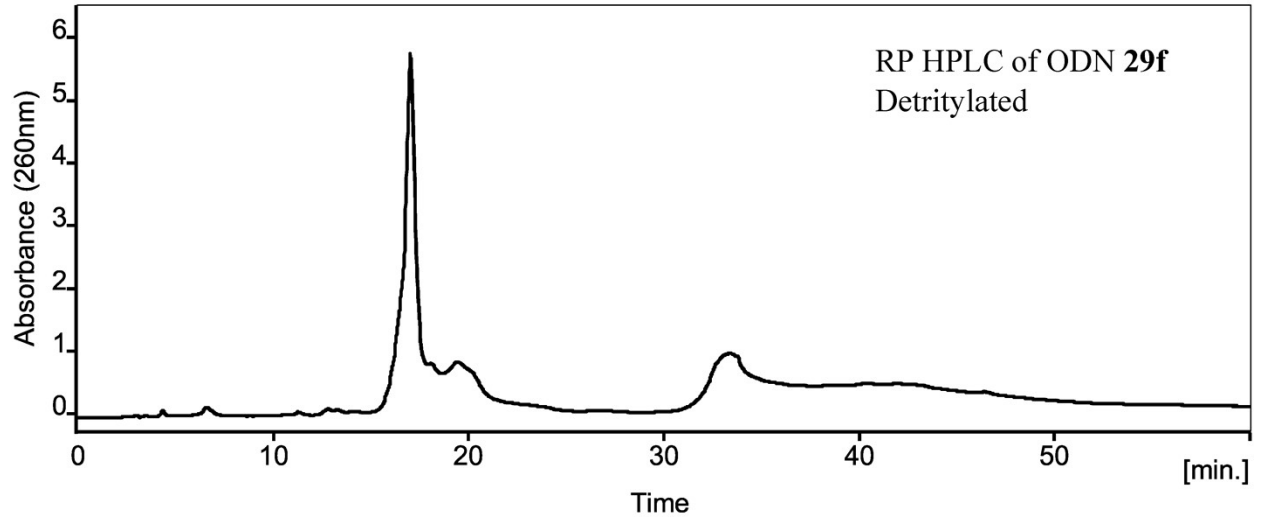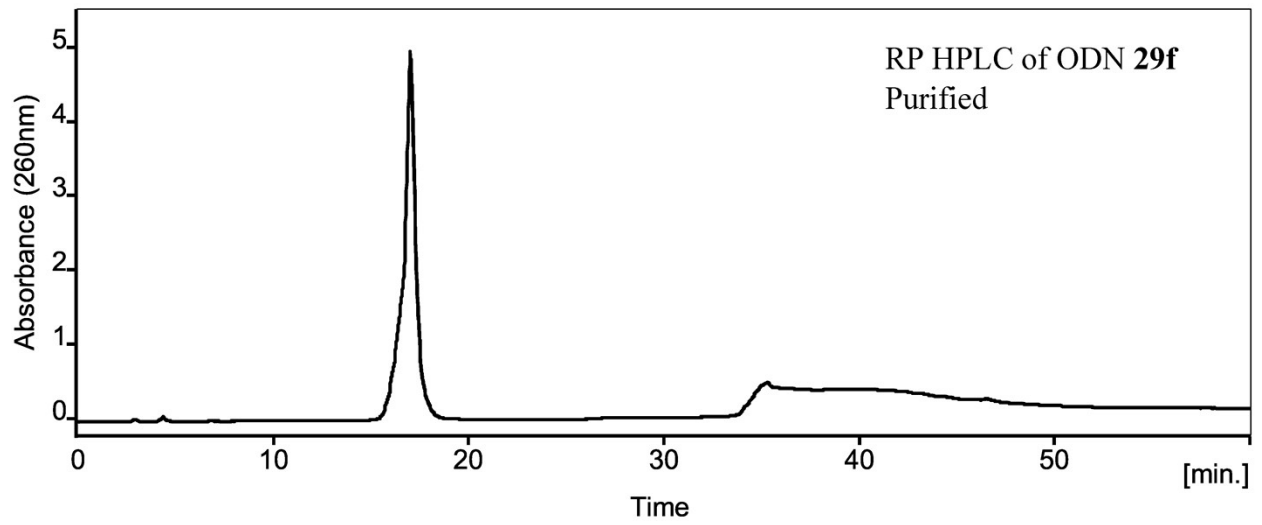

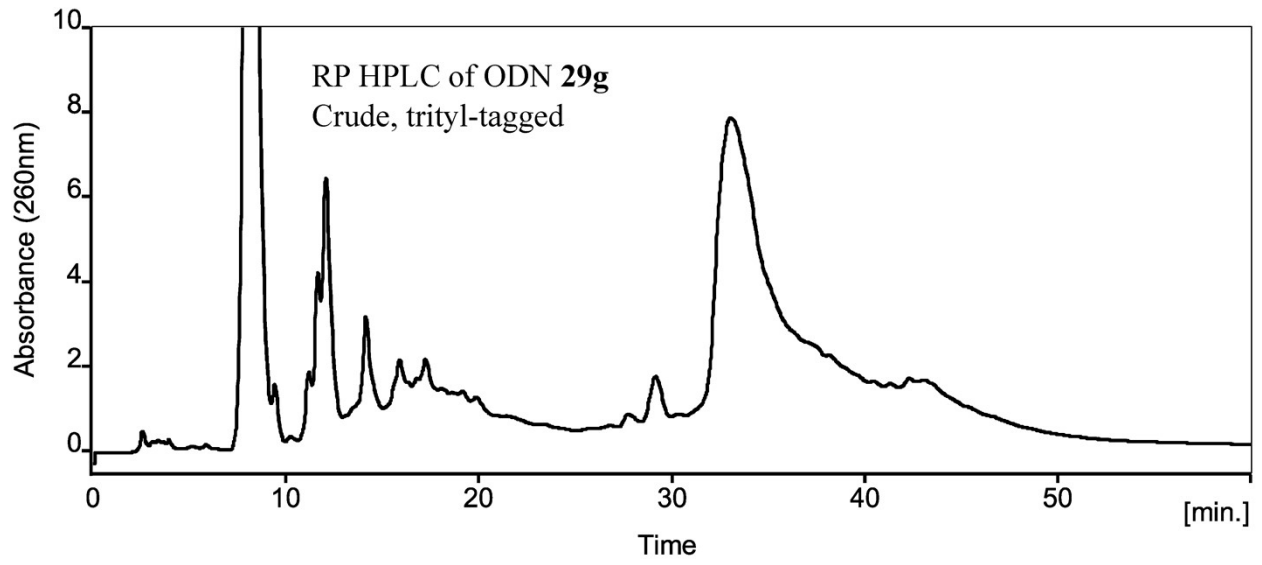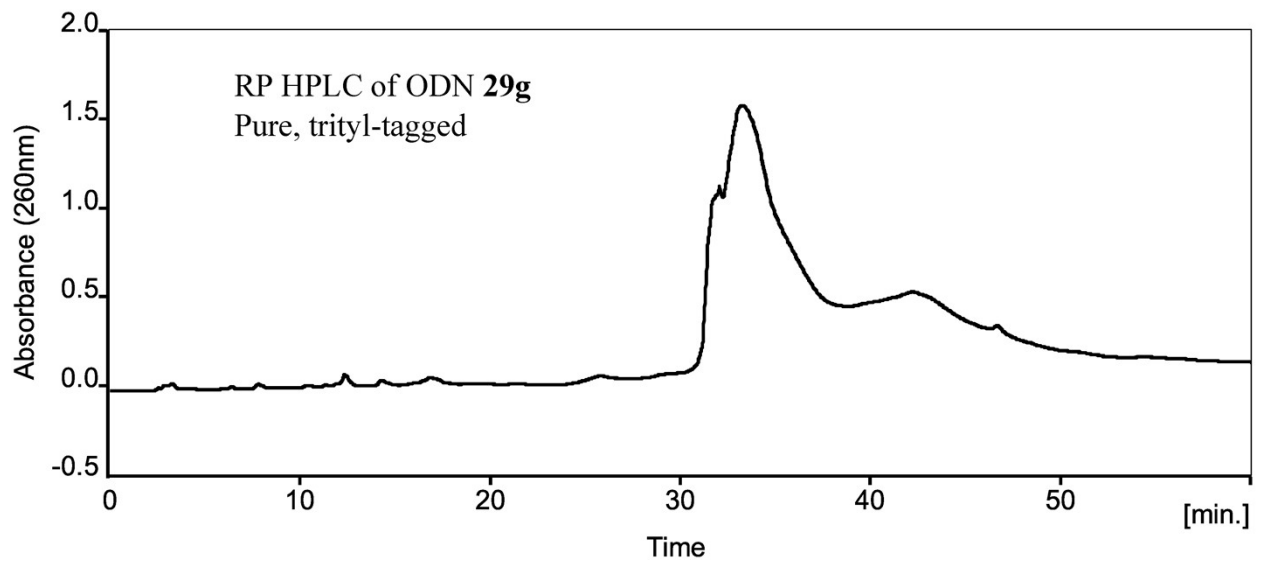

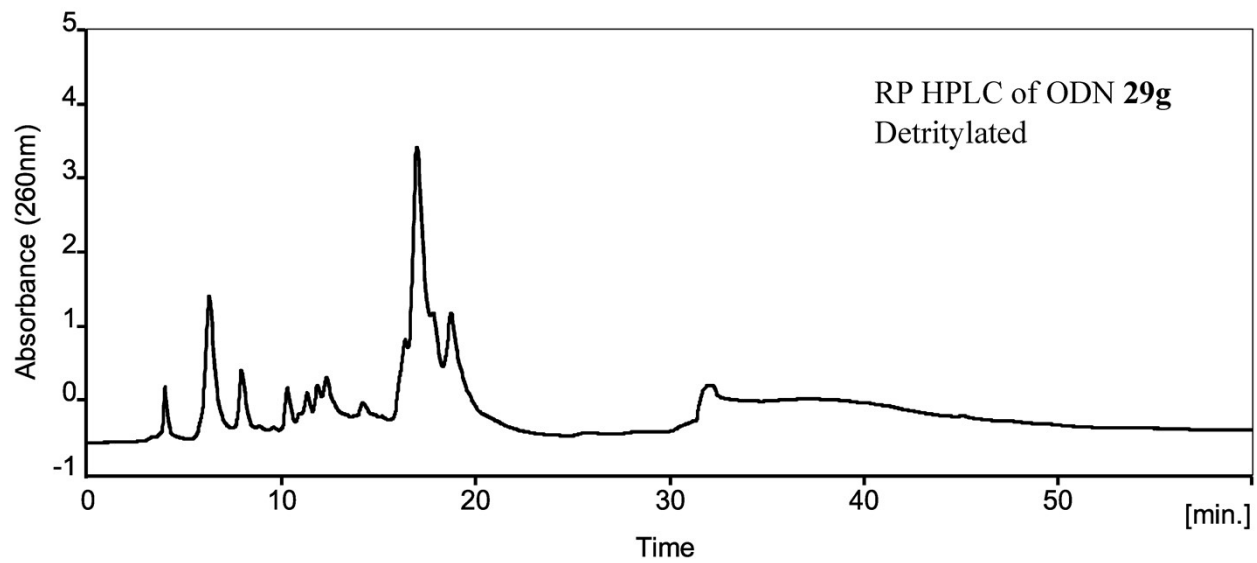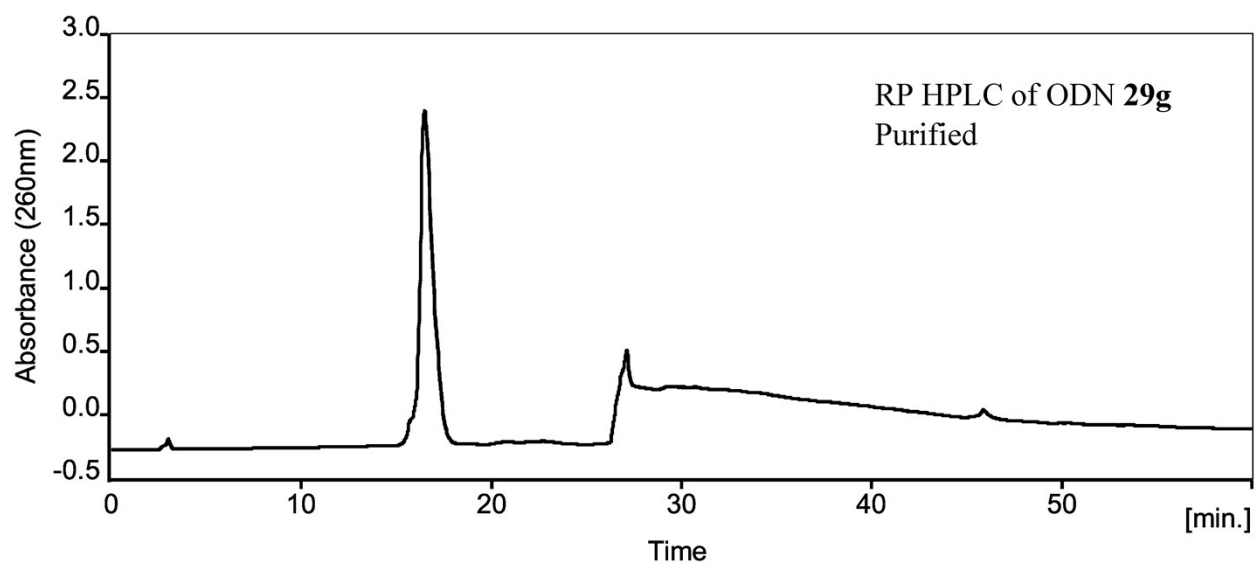

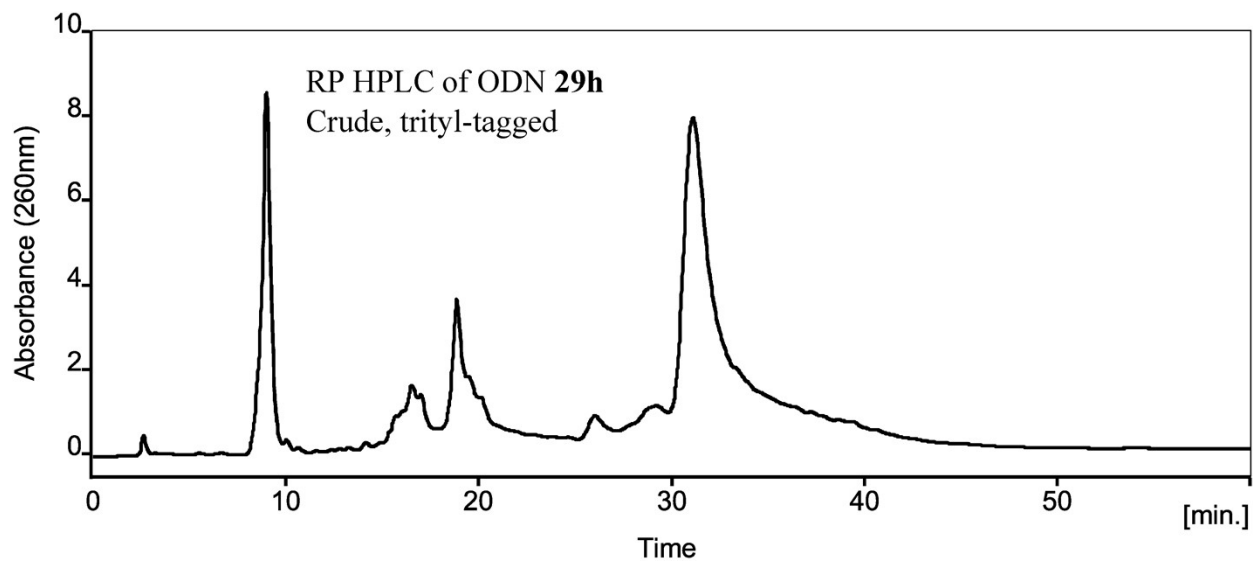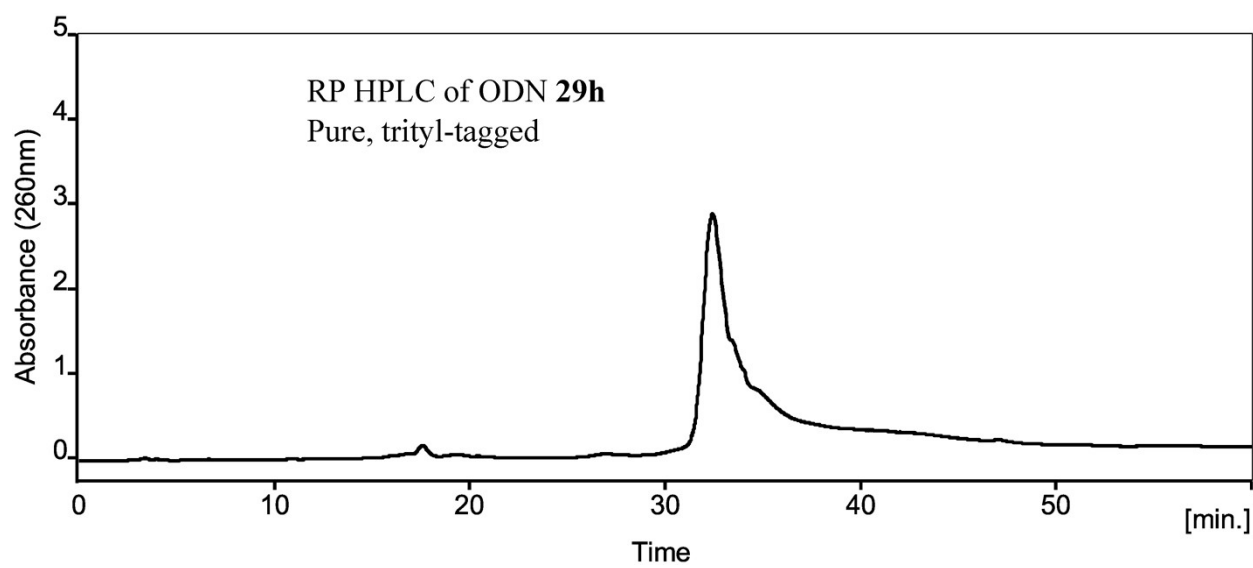

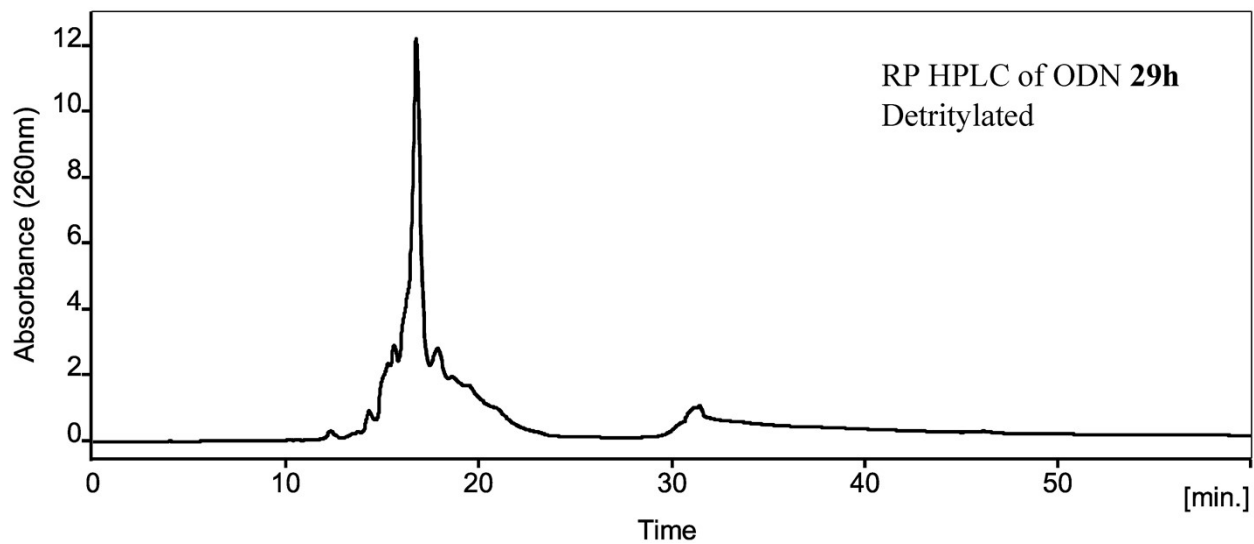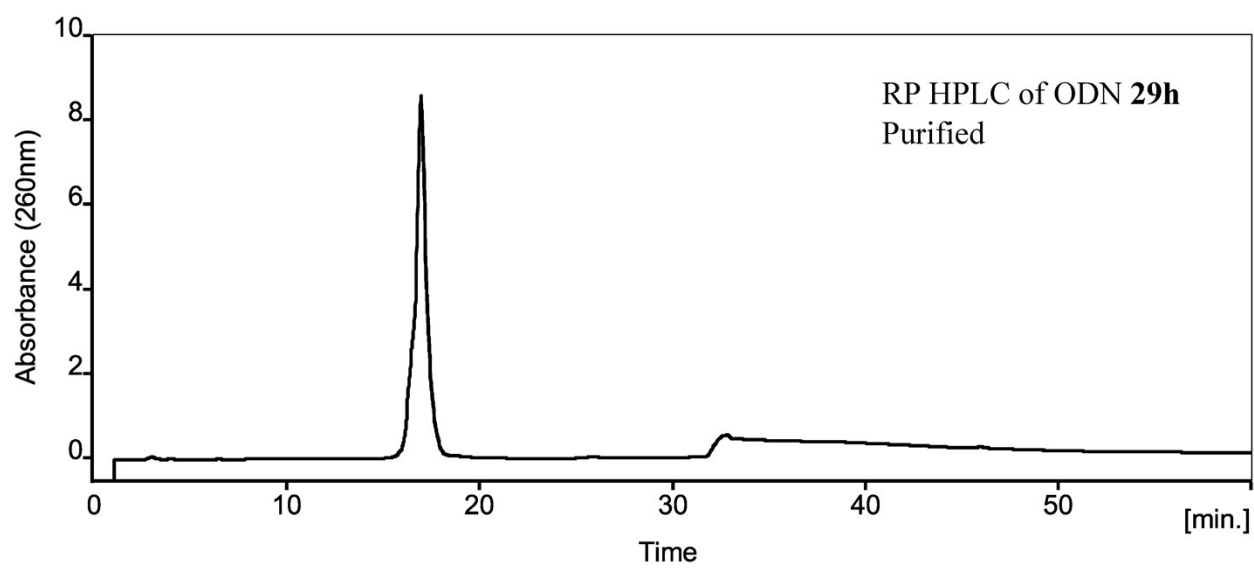

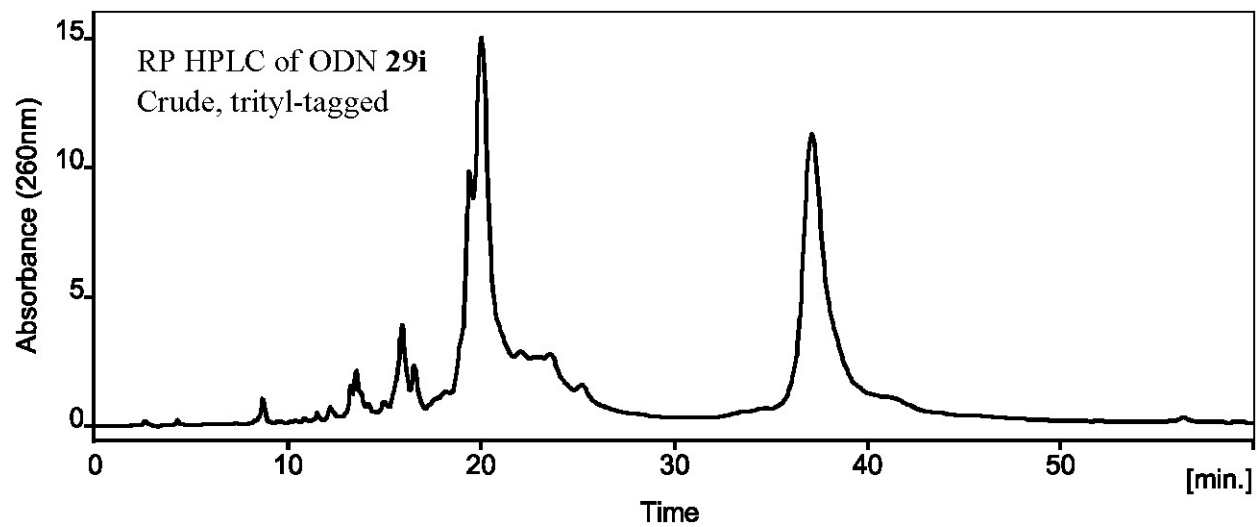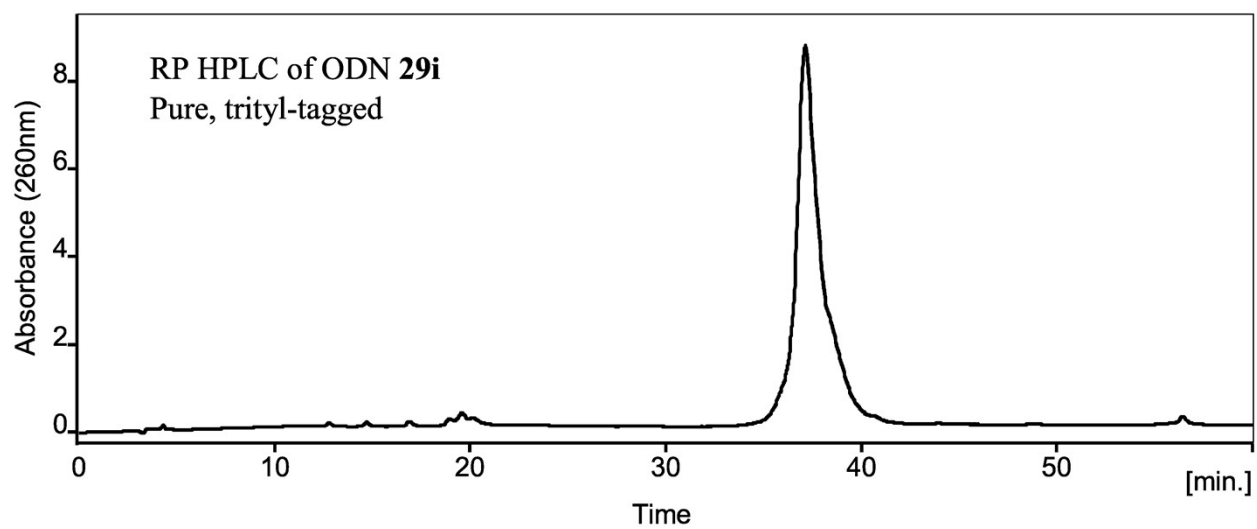

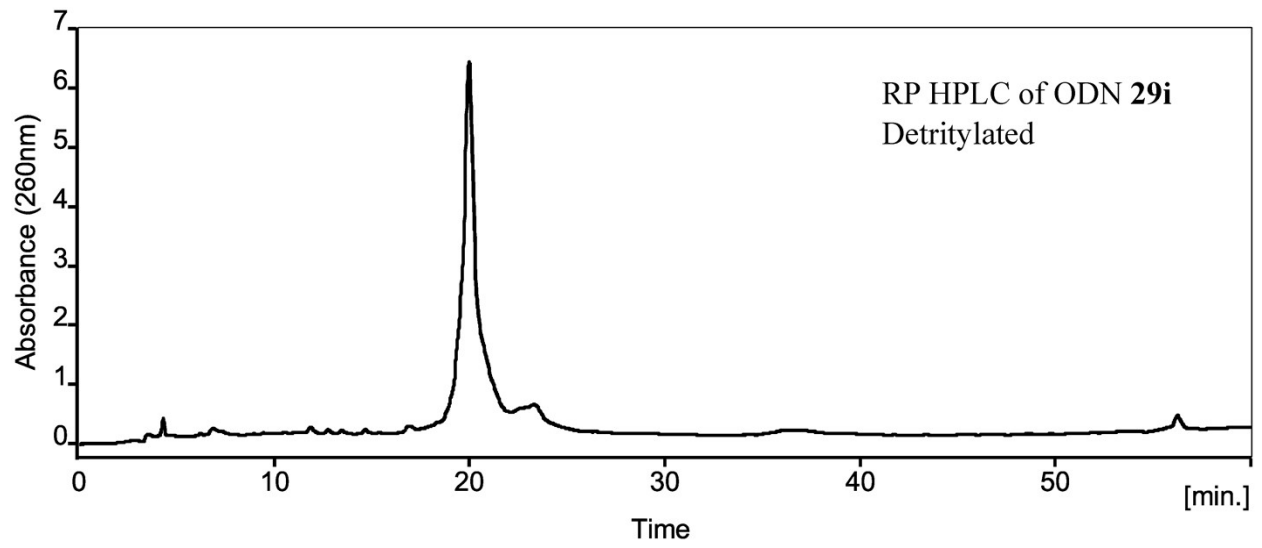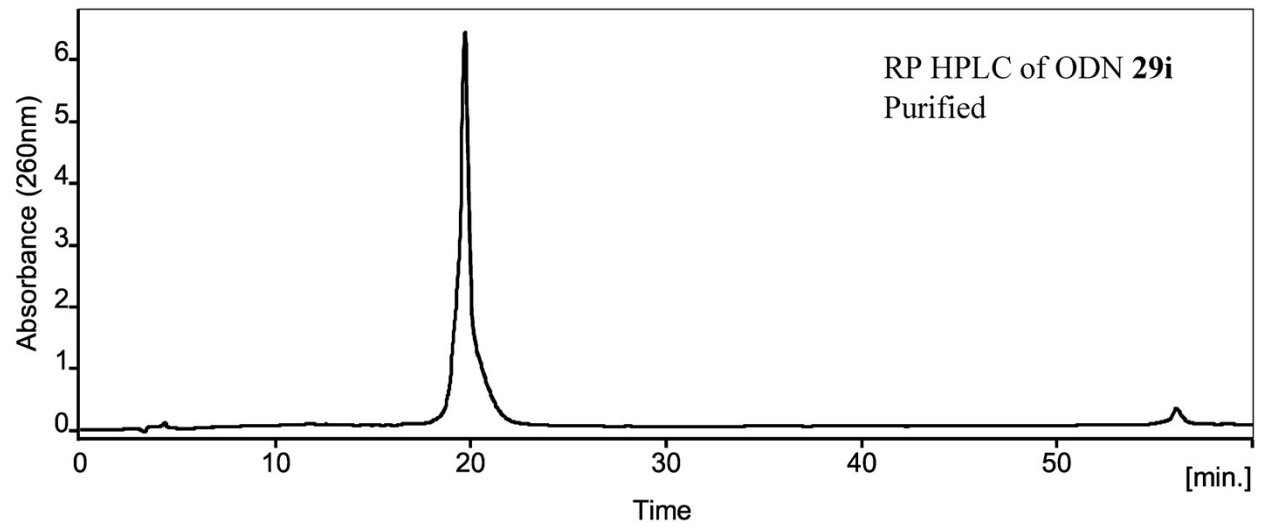



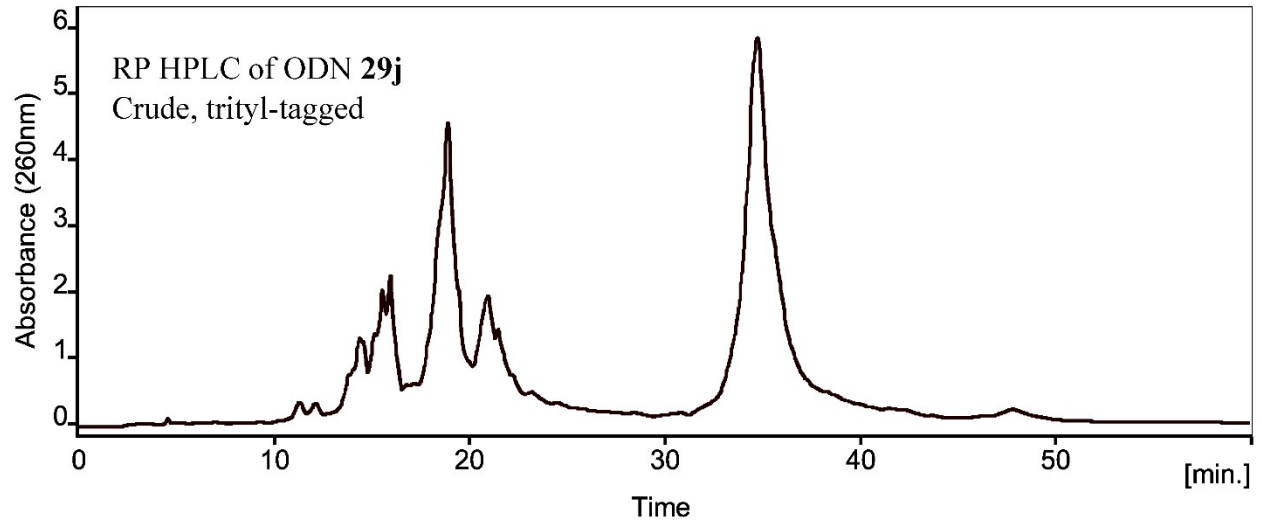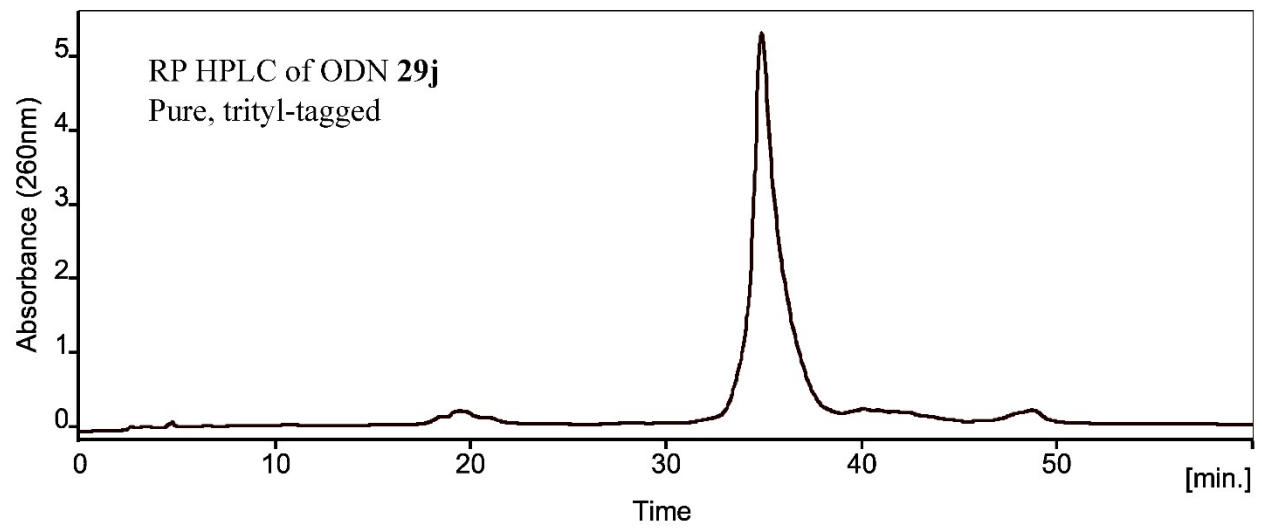

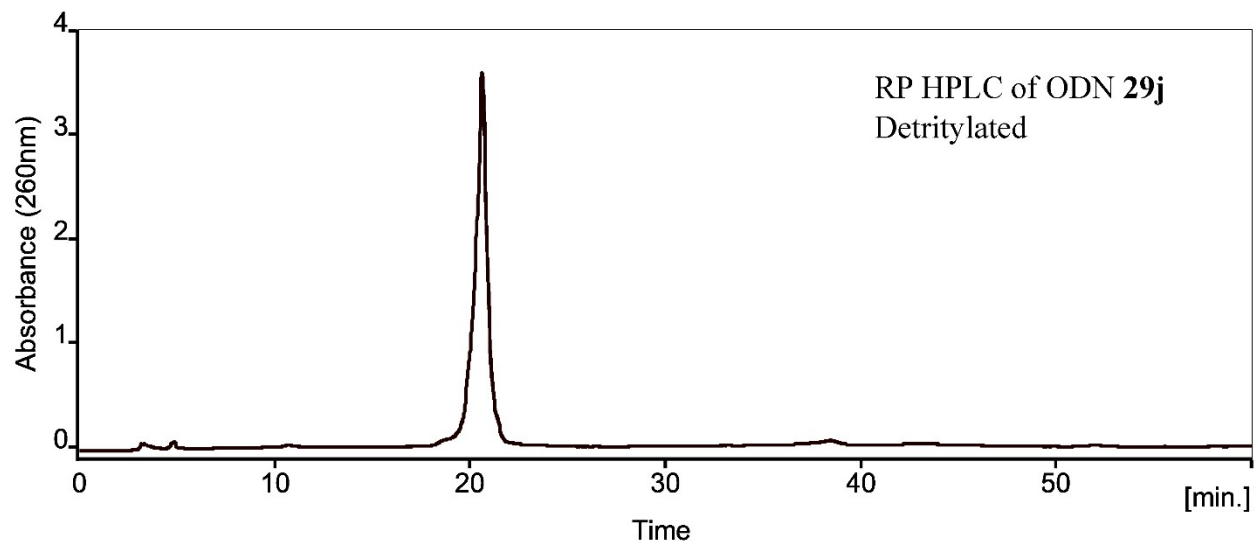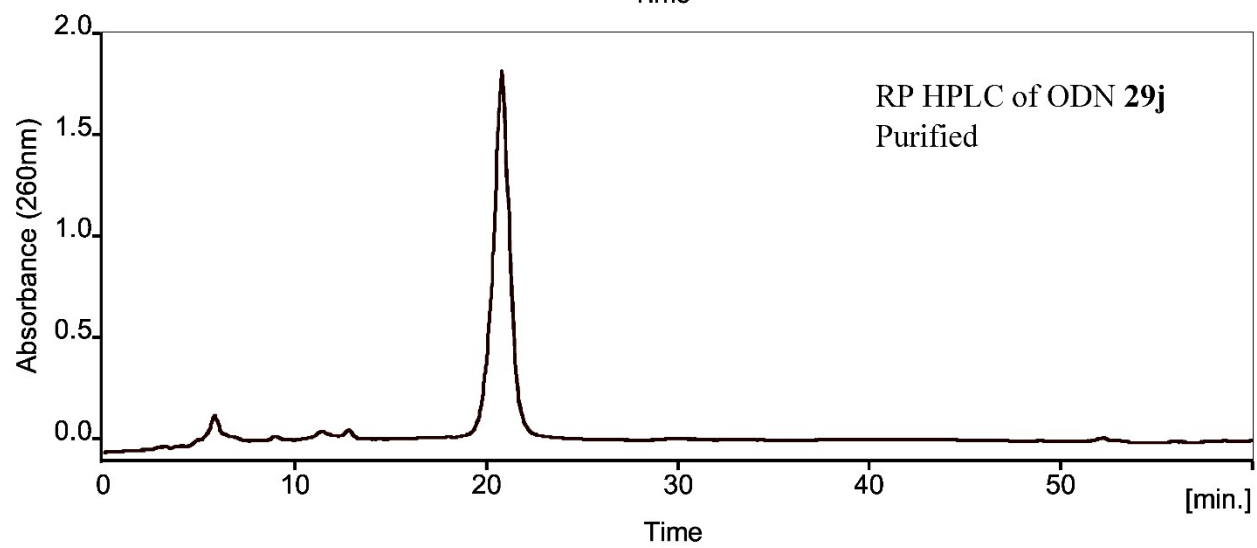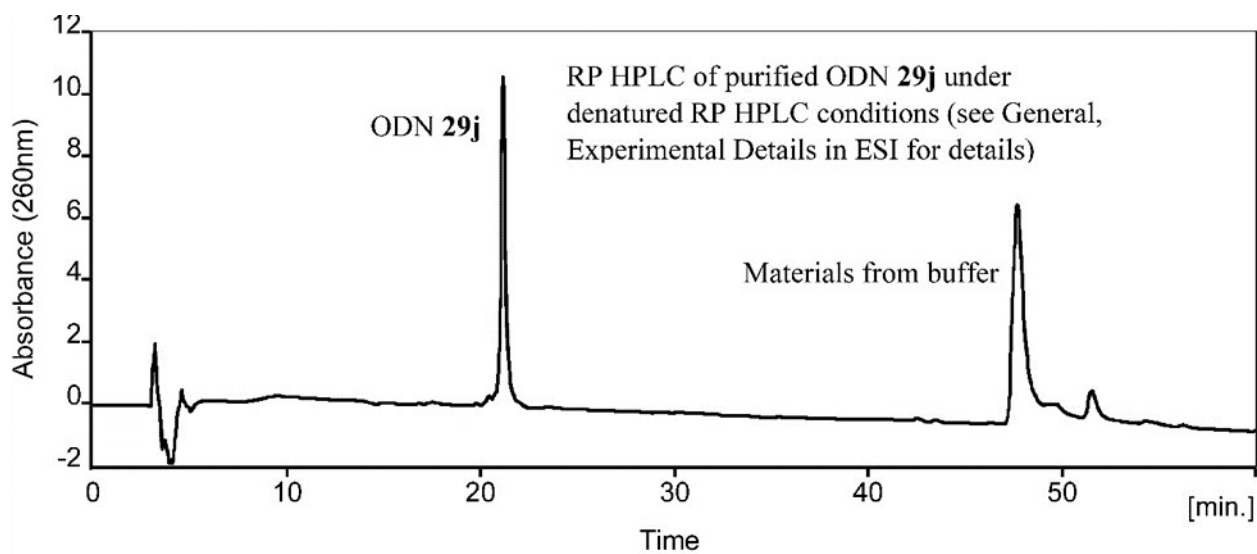

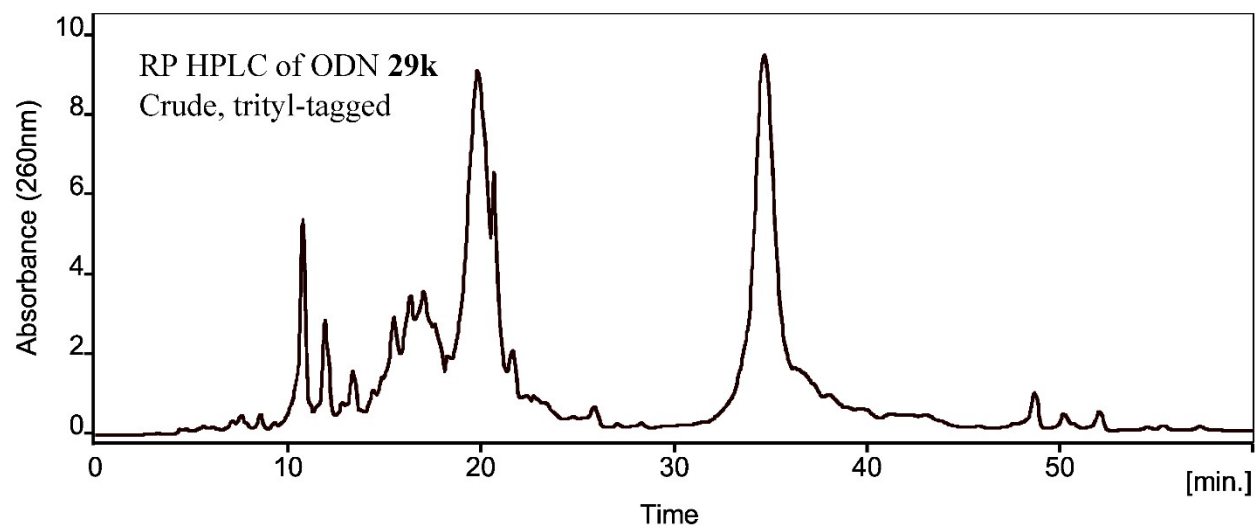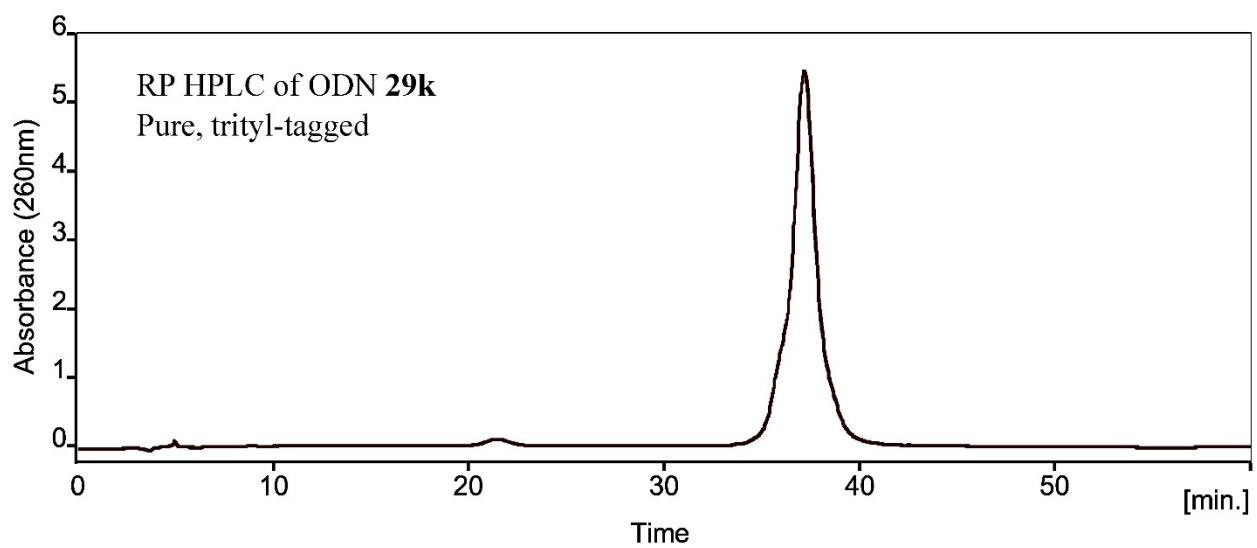

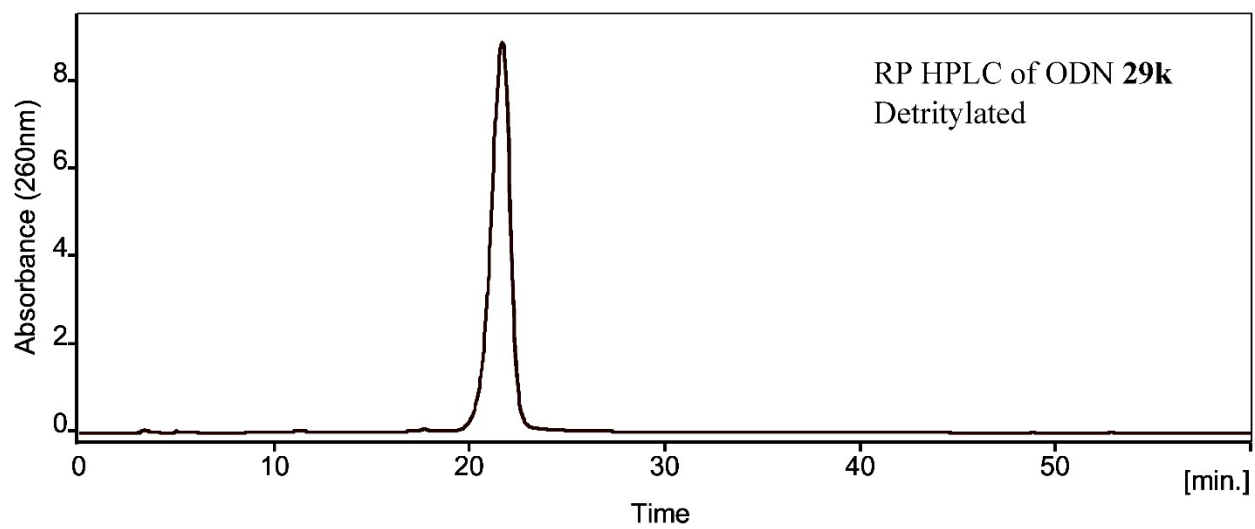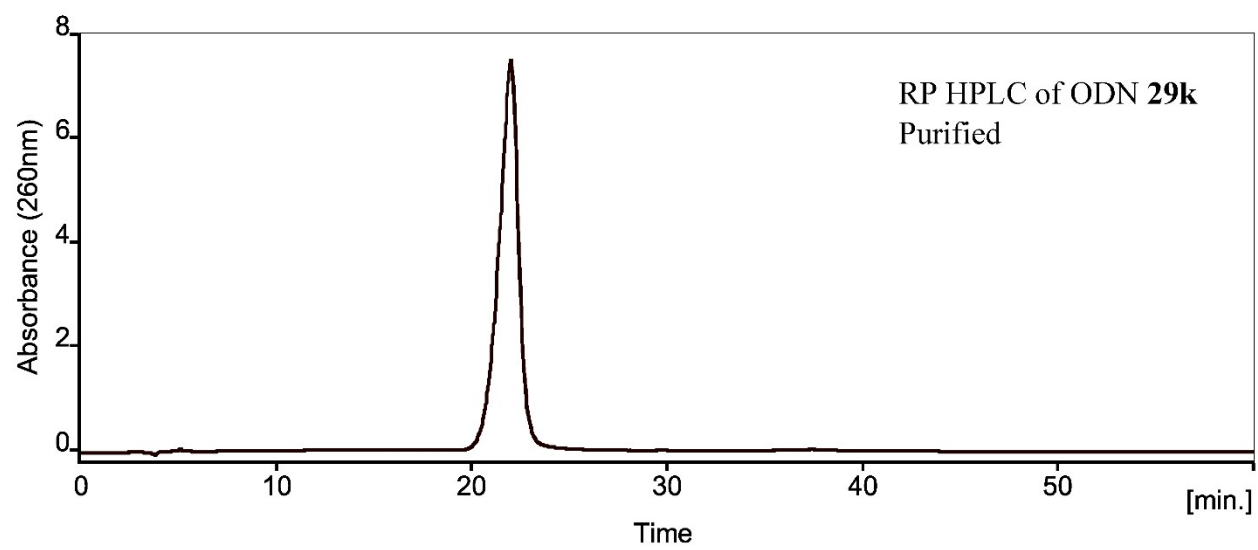

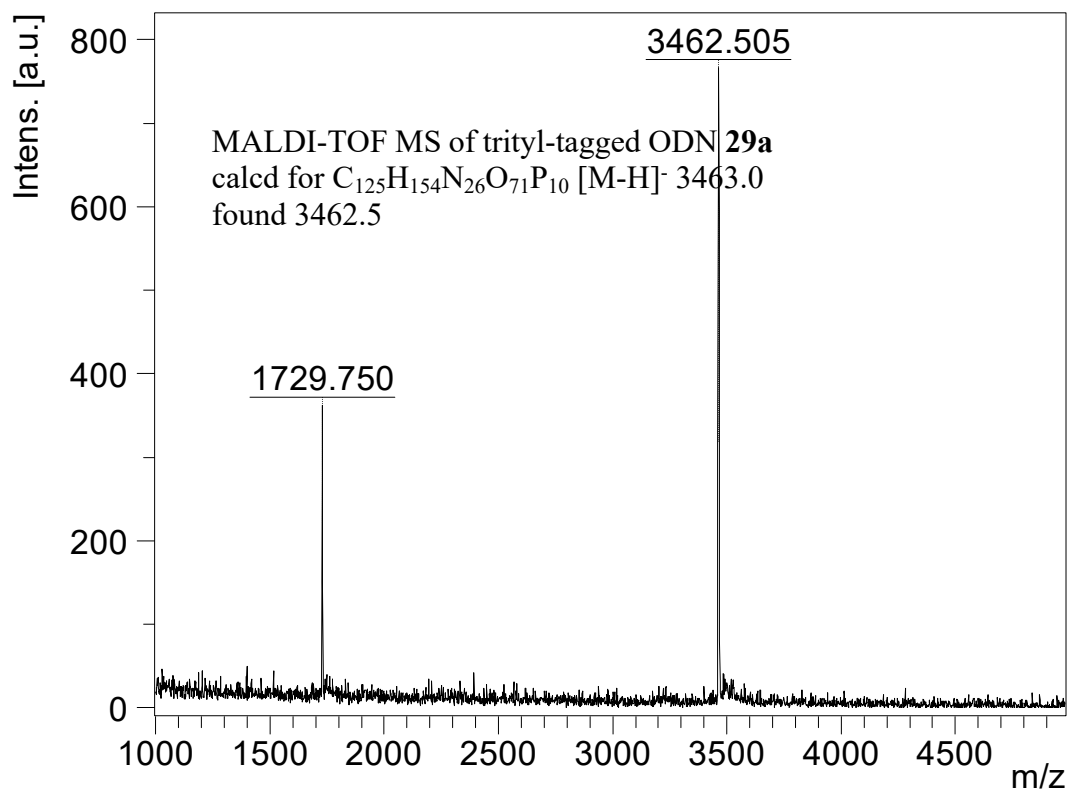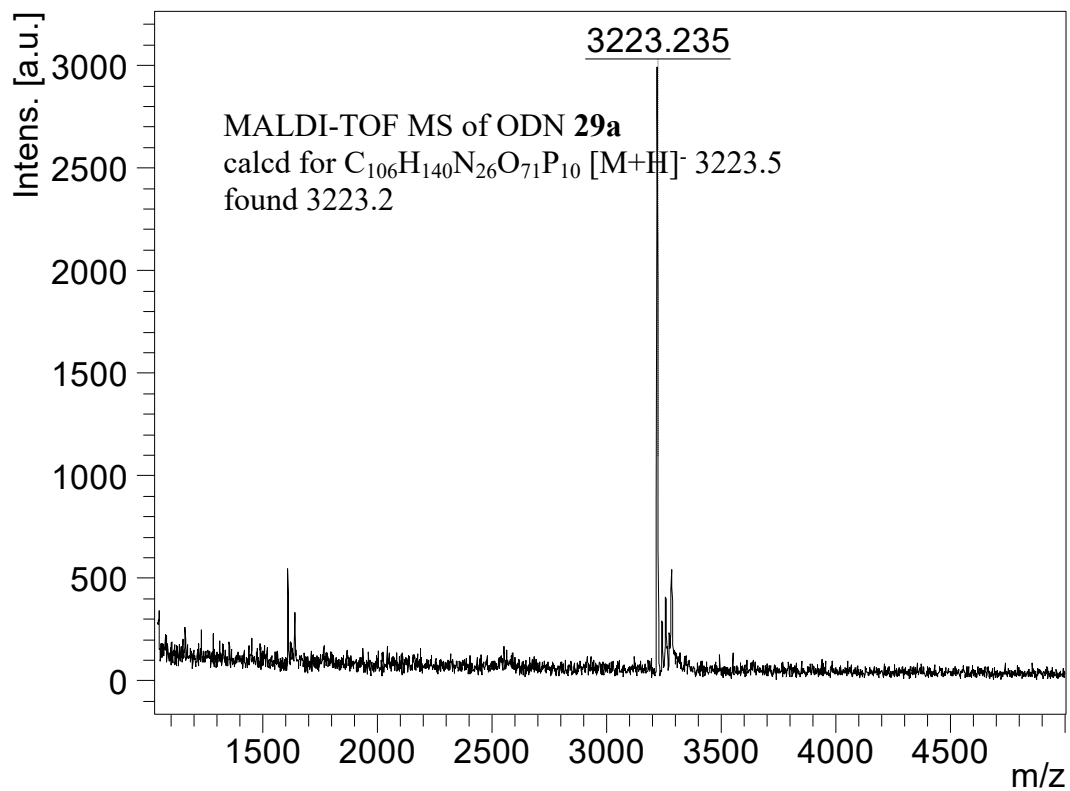

OD<sub>260</sub> of ODN **29a** for the 0.52  $\mu$ mol synthesis is 2.940.

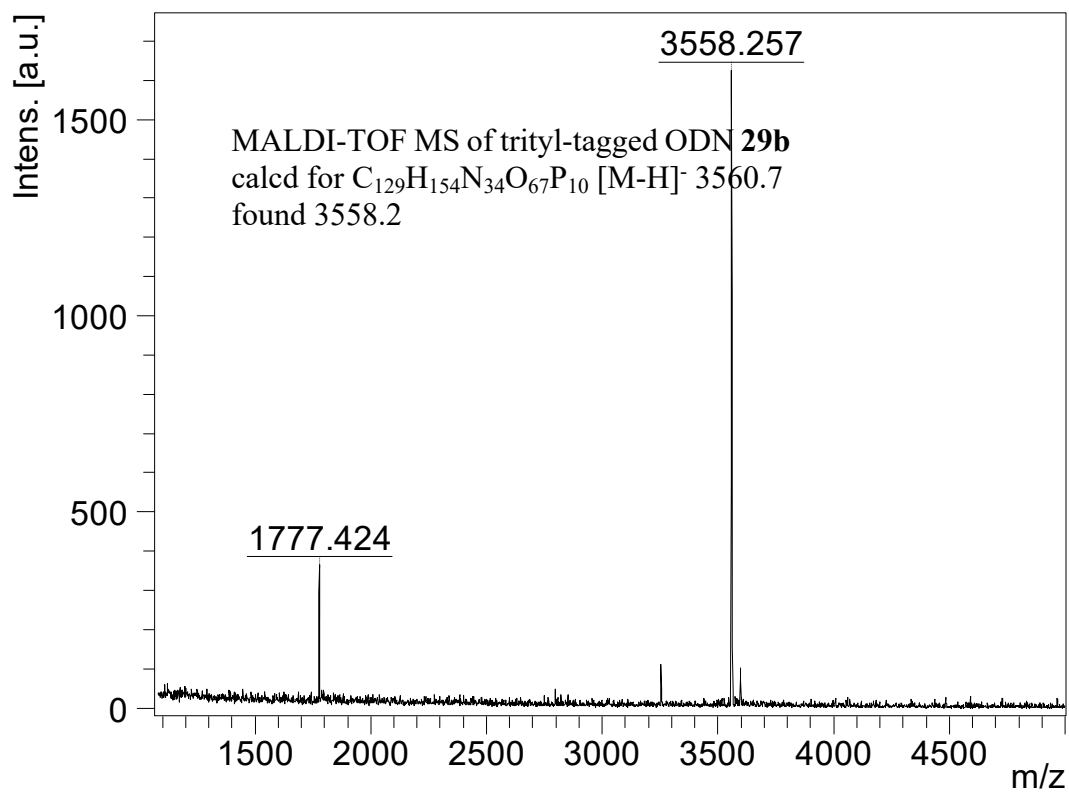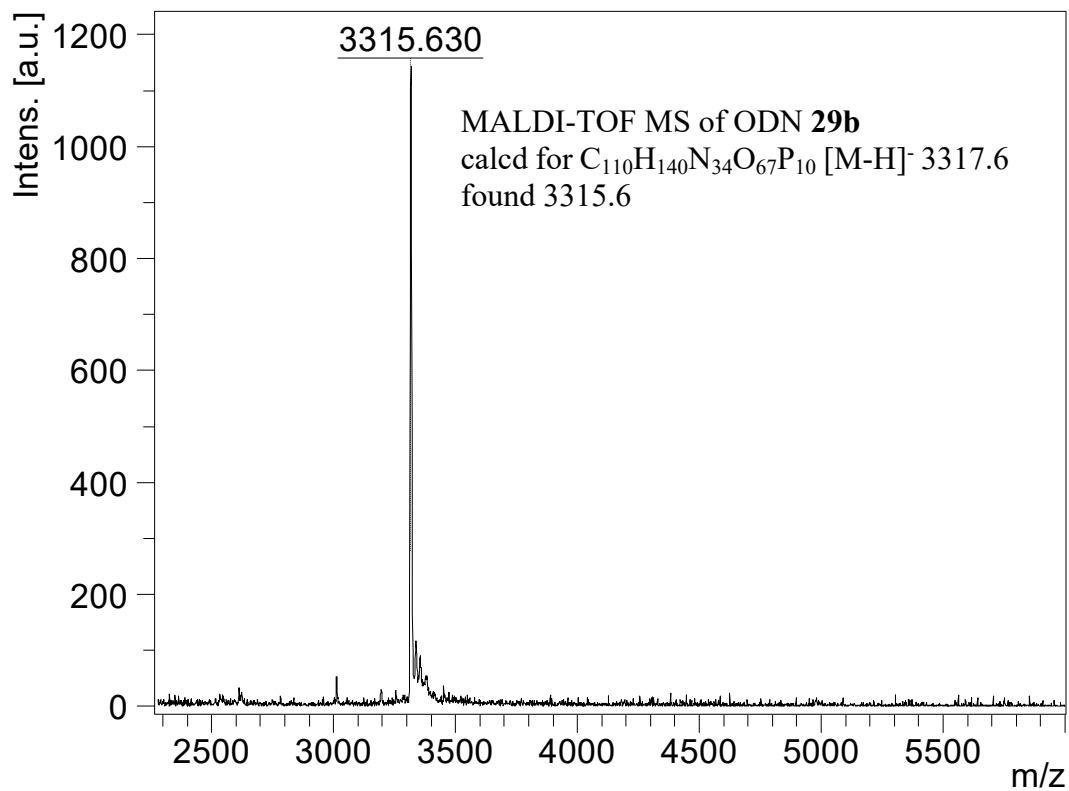

OD<sub>260</sub> of ODN **29b** for the 0.52  $\mu$ mol synthesis is 3.660.

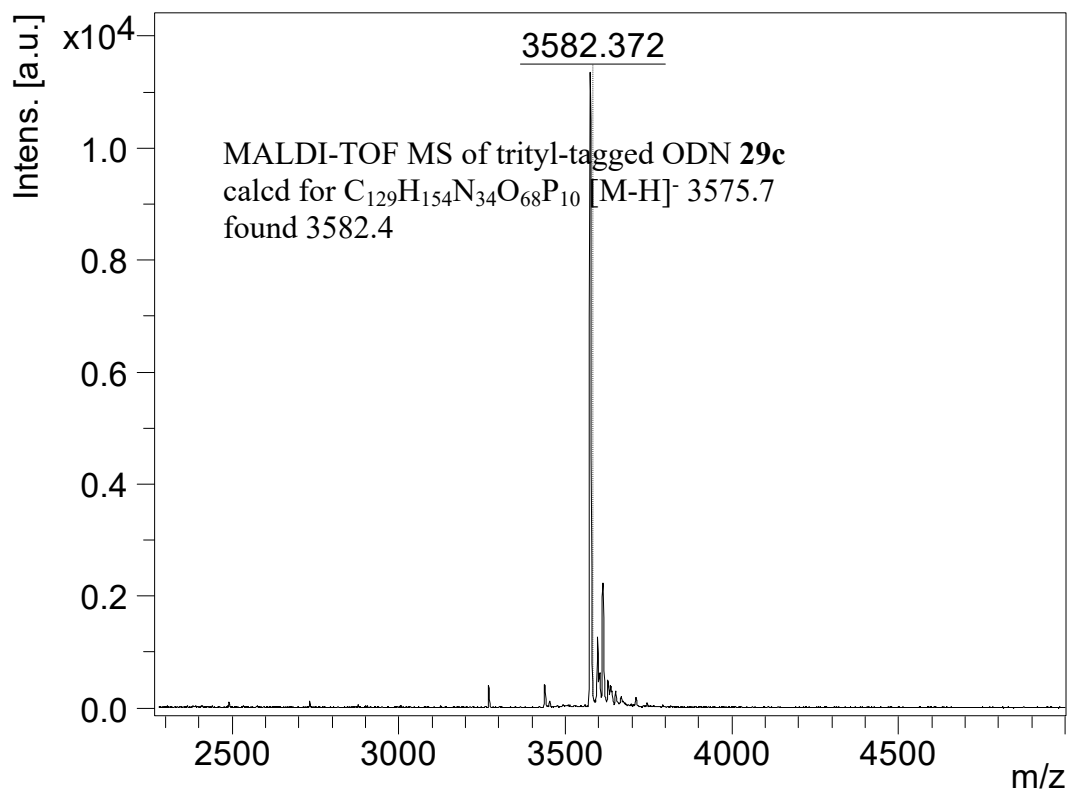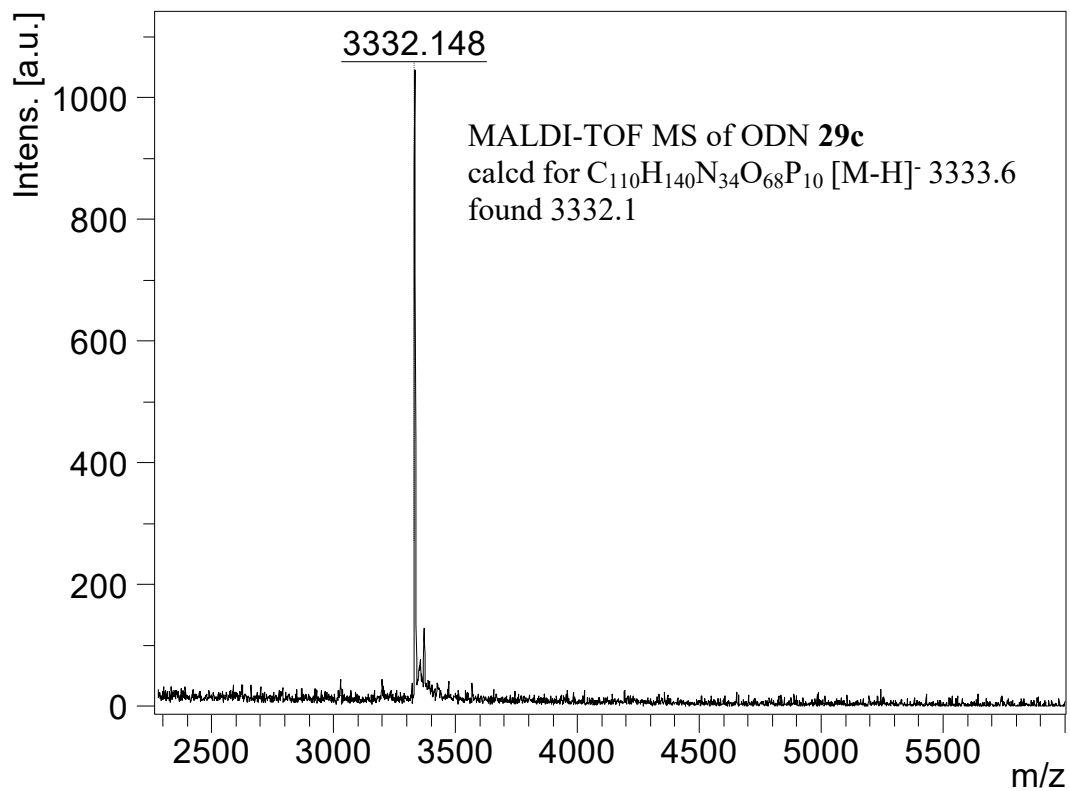

OD<sub>260</sub> of ODN **29c** for the 0.52  $\mu$ mol synthesis is 3.092.

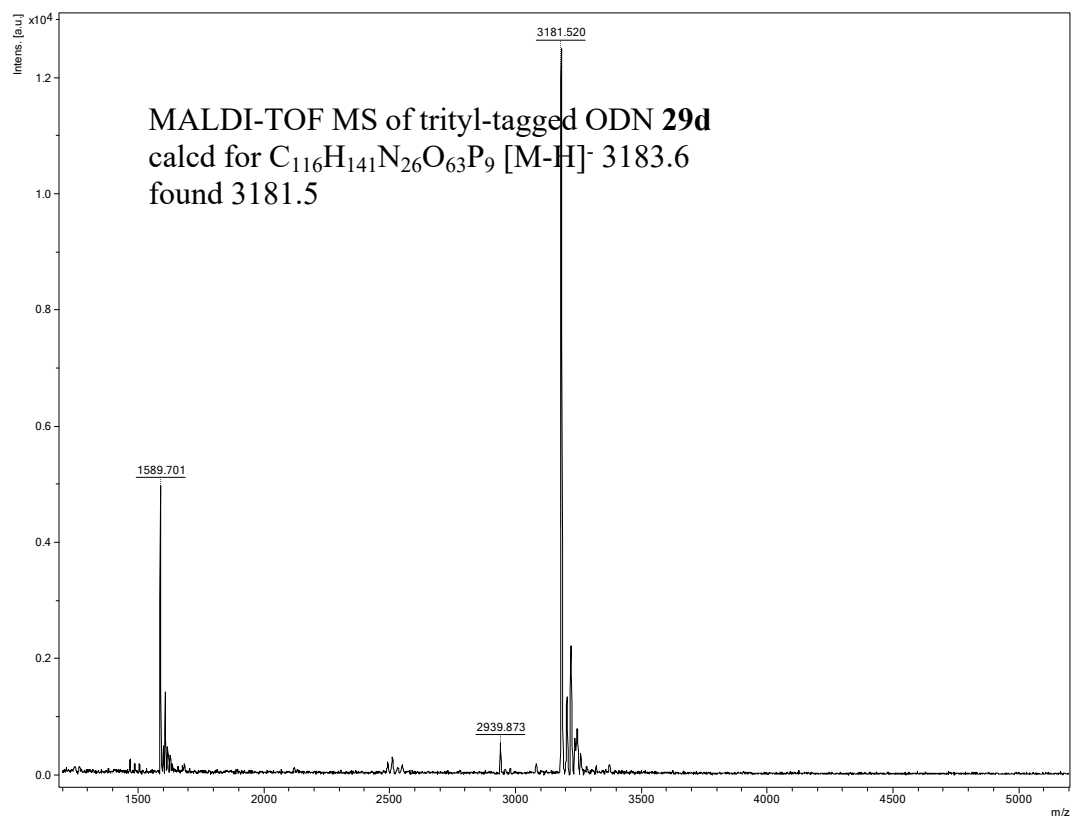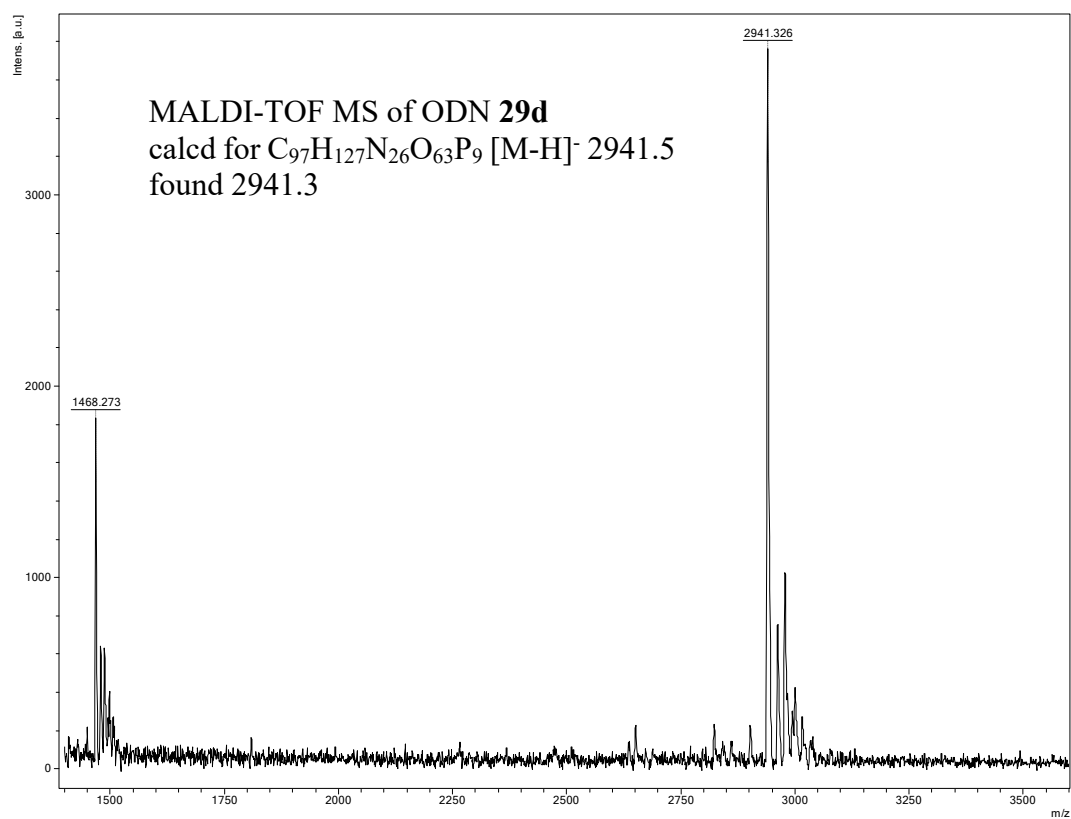

OD<sub>260</sub> of ODN **29d** for the 0.52  $\mu$ mol synthesis is 0.612.



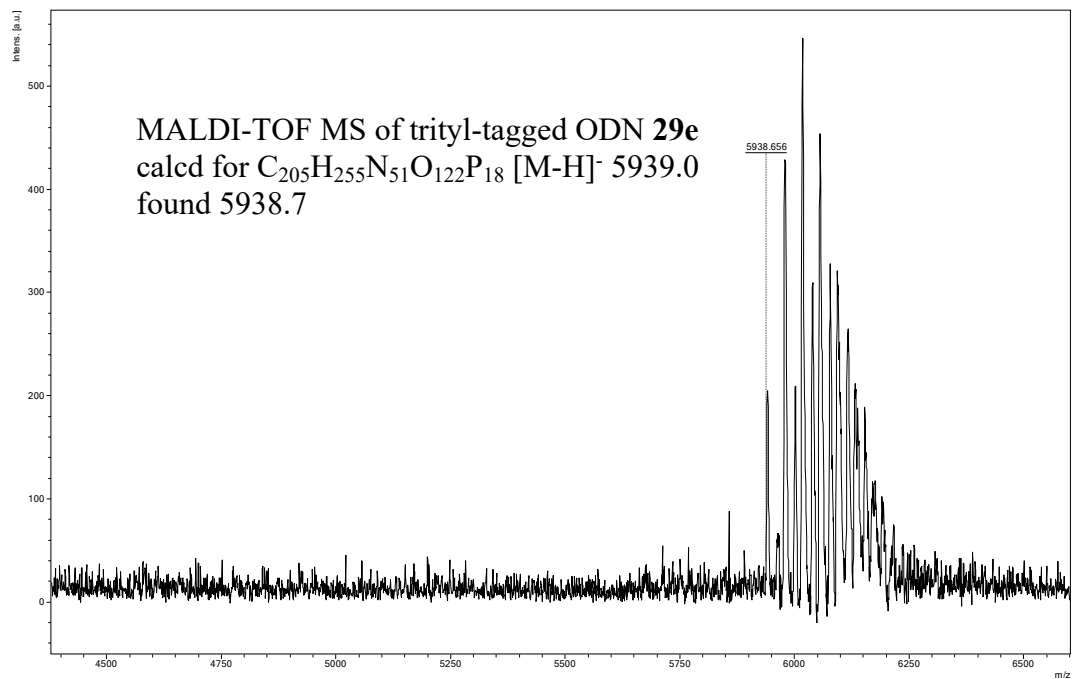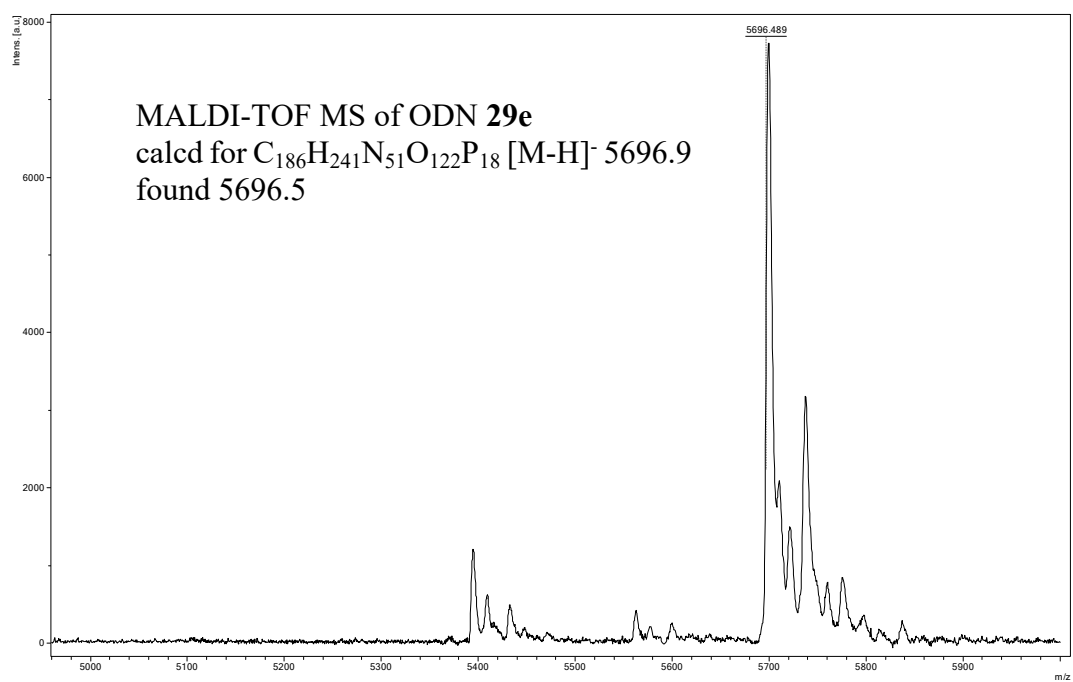

OD<sub>260</sub> of ODN **29e** for the 0.52  $\mu$ mol synthesis is 0.542.

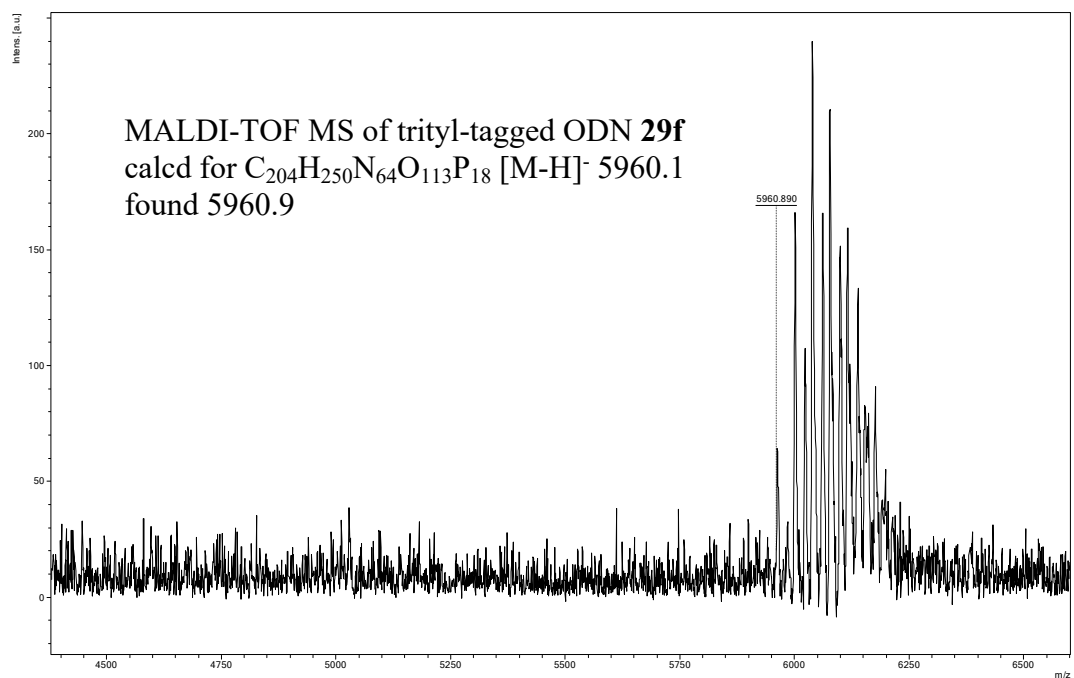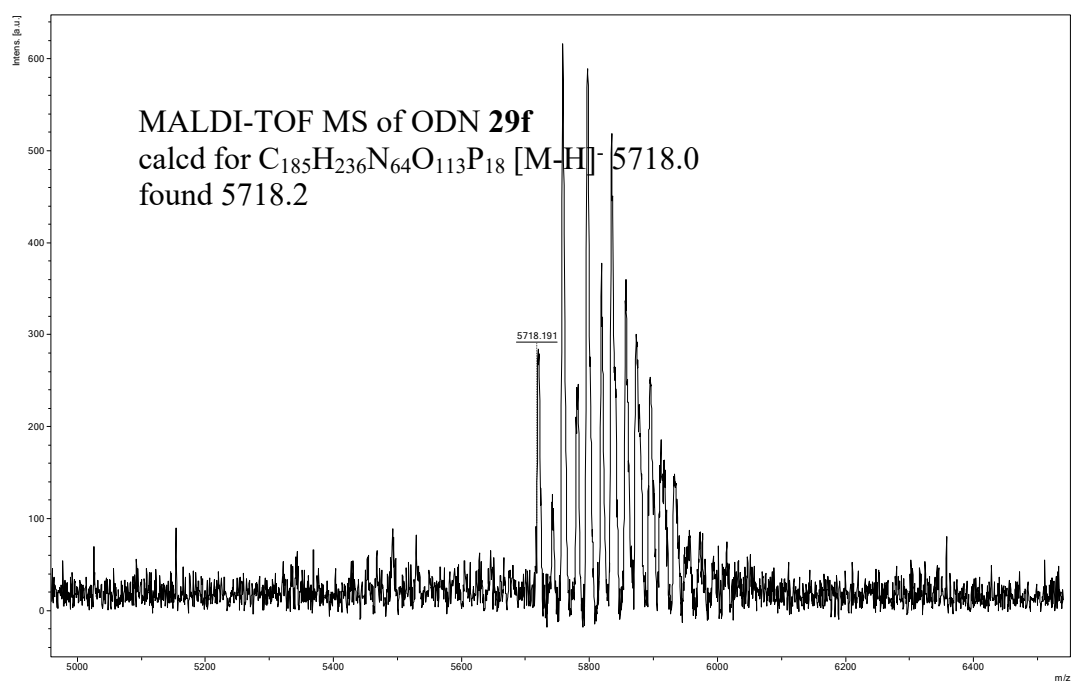

OD<sub>260</sub> of ODN **29f** for the 0.52 μmol synthesis is 1.119.

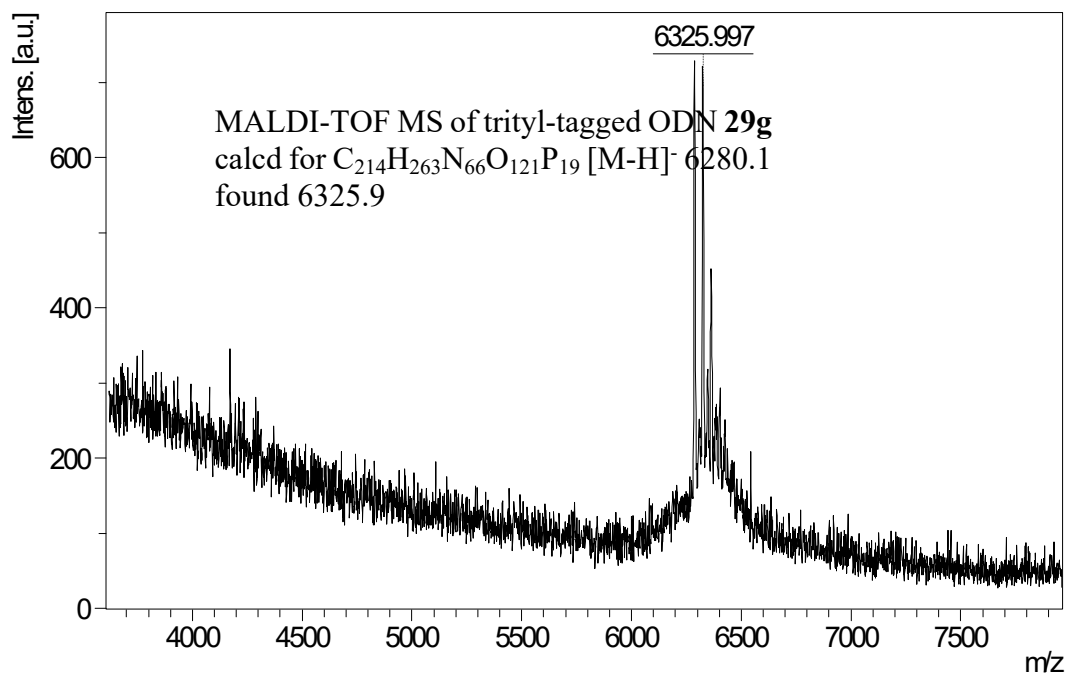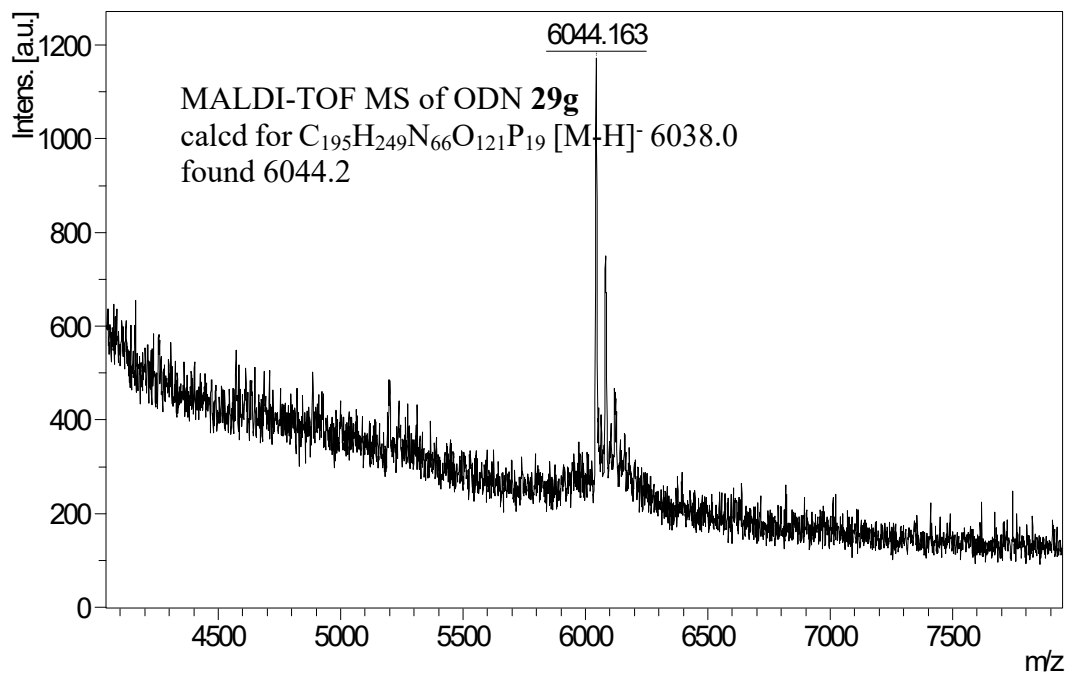

OD<sub>260</sub> of ODN **29g** for the 0.52 μmol synthesis is 1.144.

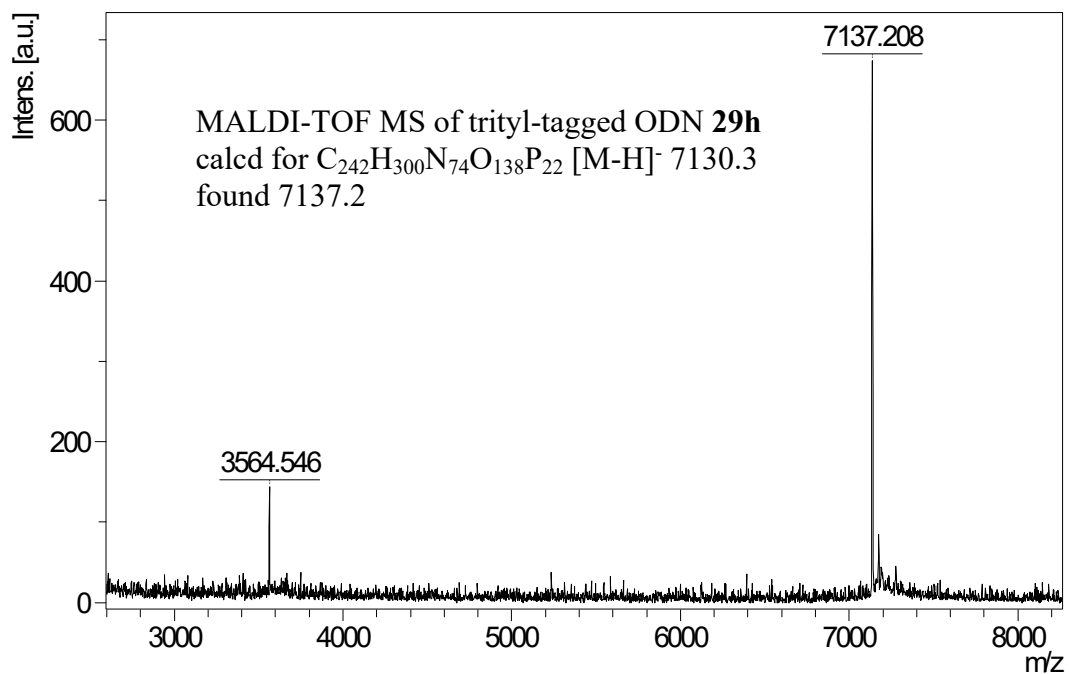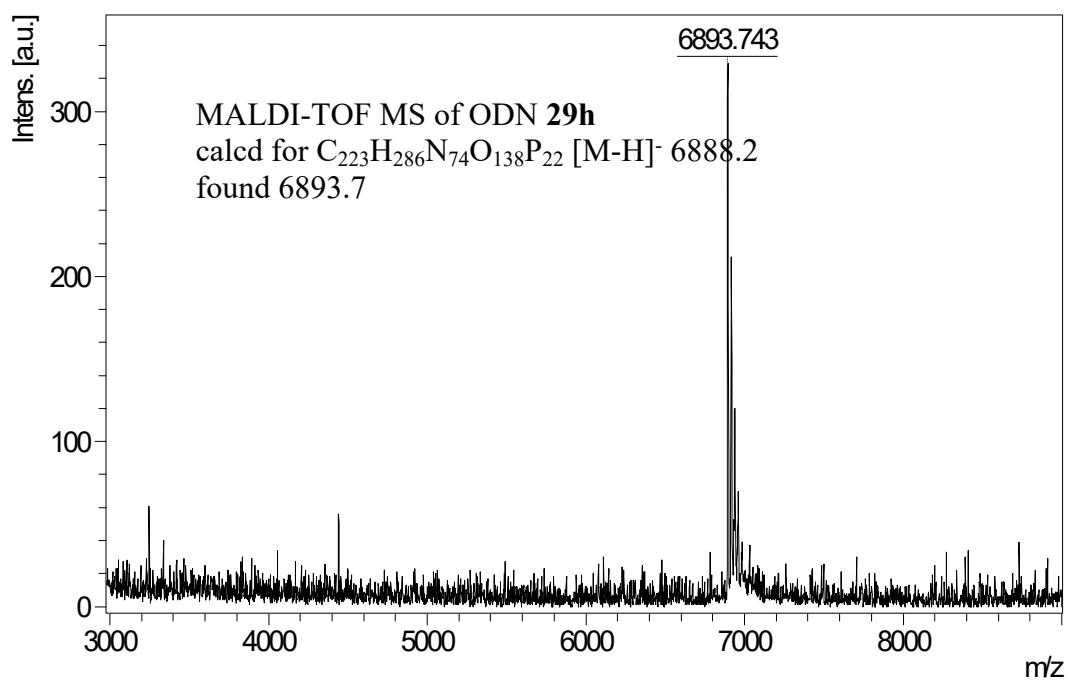

OD<sub>260</sub> of ODN **29h** for the 0.52  $\mu$ mol synthesis is 3.243.

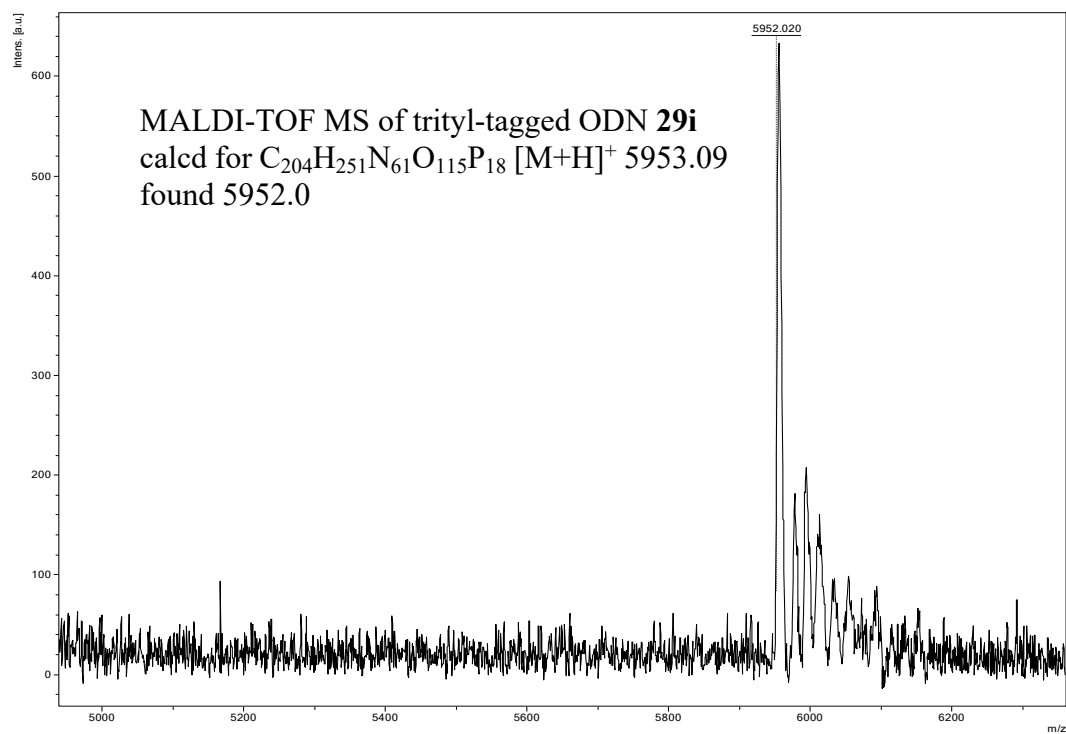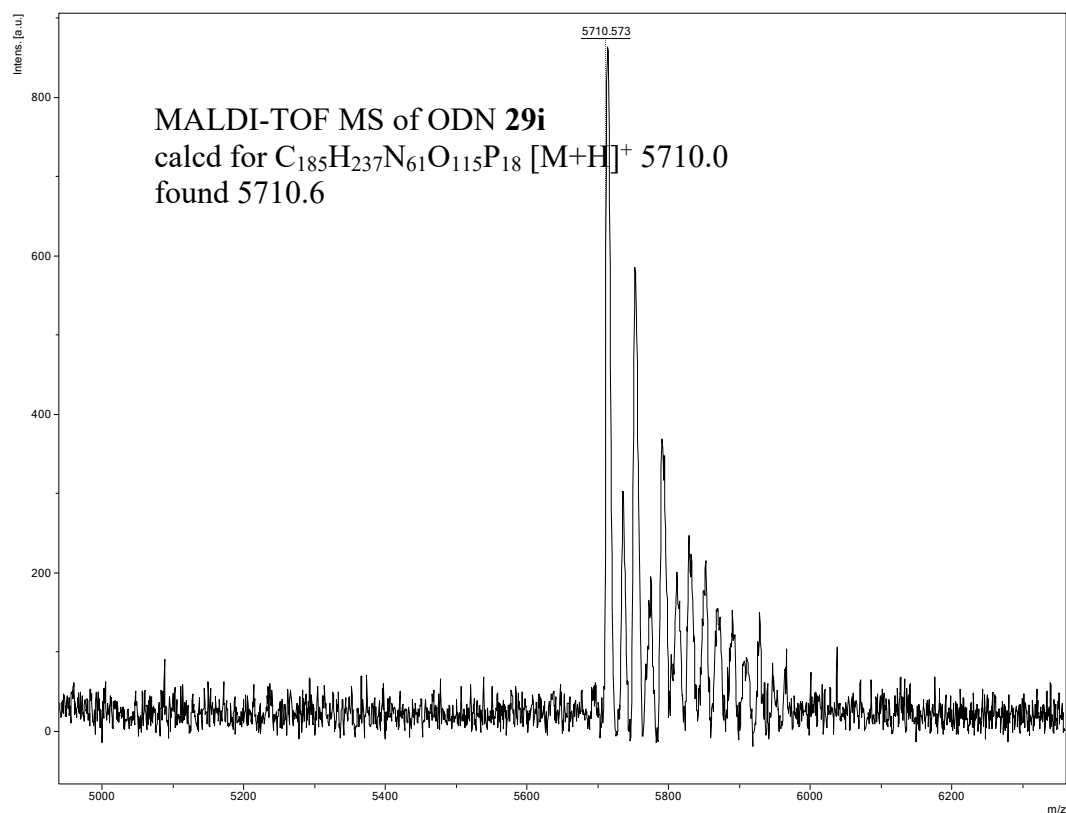

$OD_{260}$  of ODN **29i** for the 0.52  $\mu\text{mol}$  synthesis is 1.461.

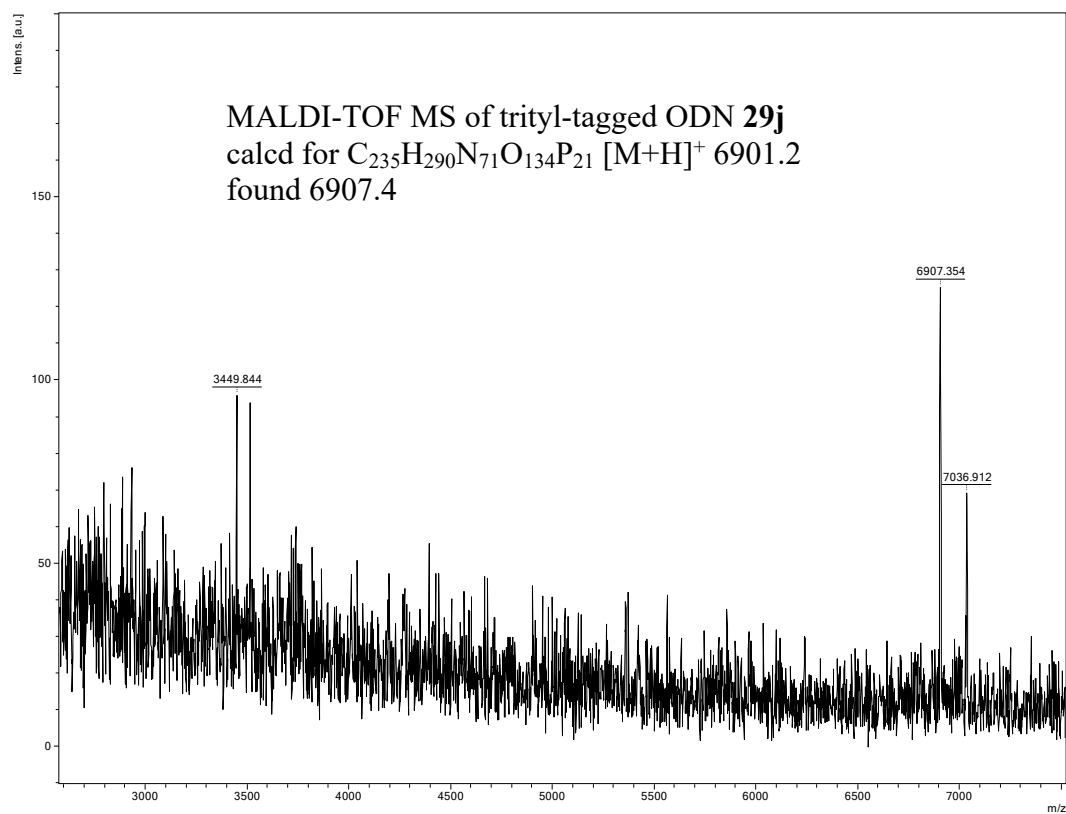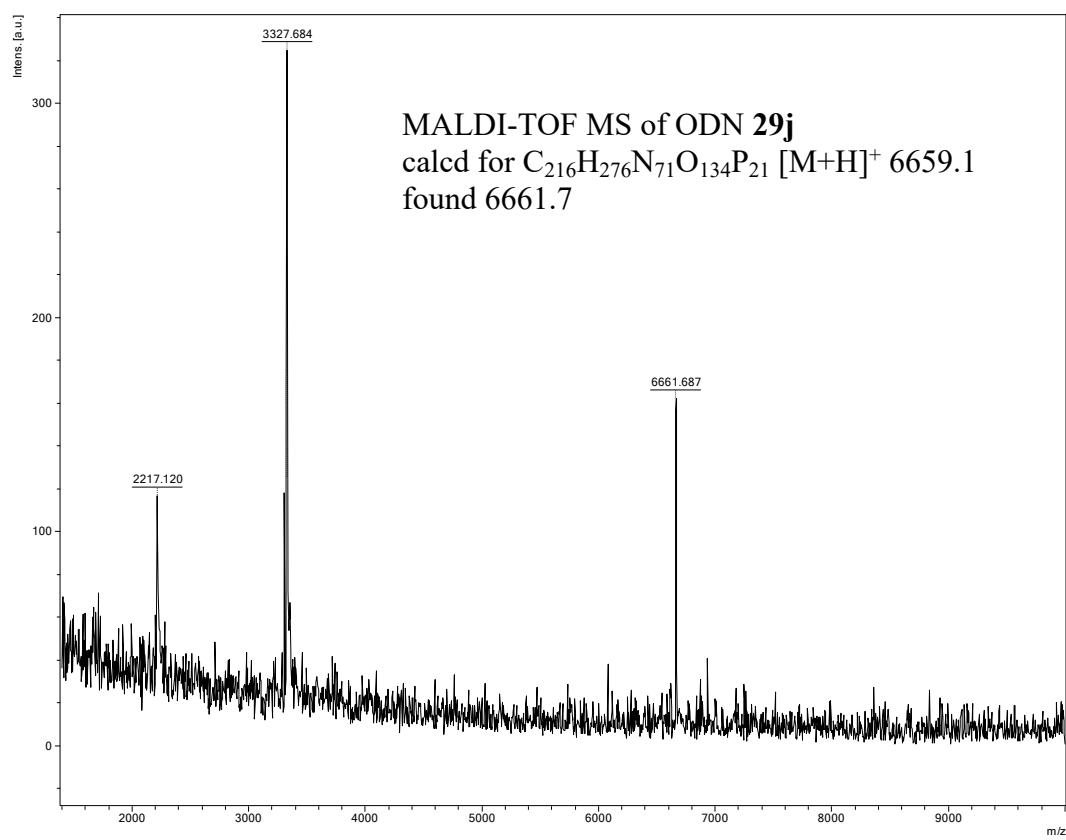

OD<sub>260</sub> of ODN **29j** for the 0.52  $\mu$ mol synthesis is 0.536.

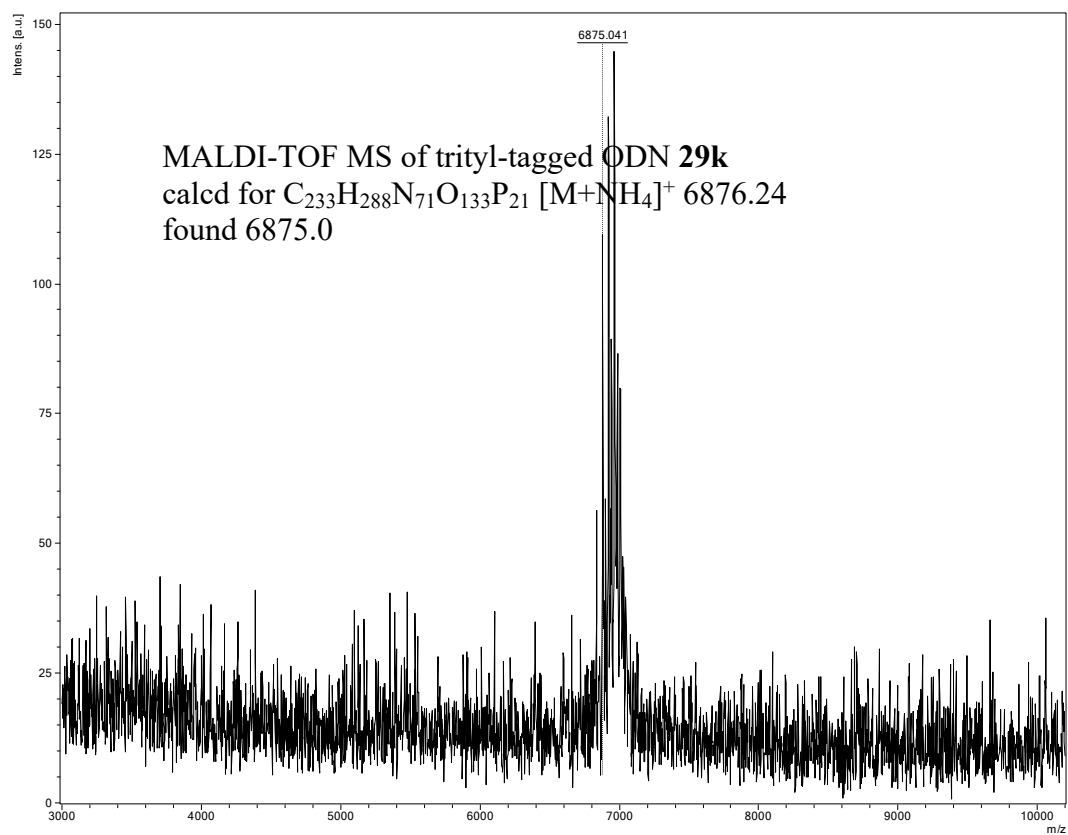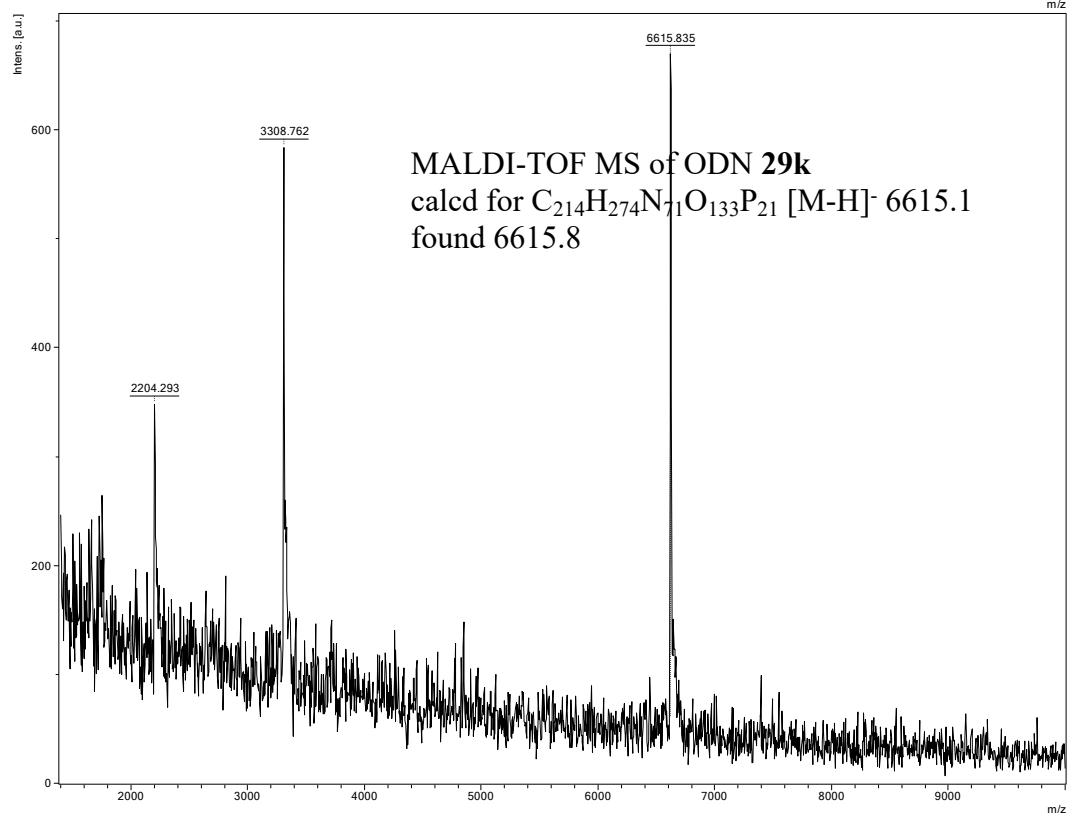

OD<sub>260</sub> of ODN **29k** for the 0.52  $\mu$ mol synthesis is 2.717.

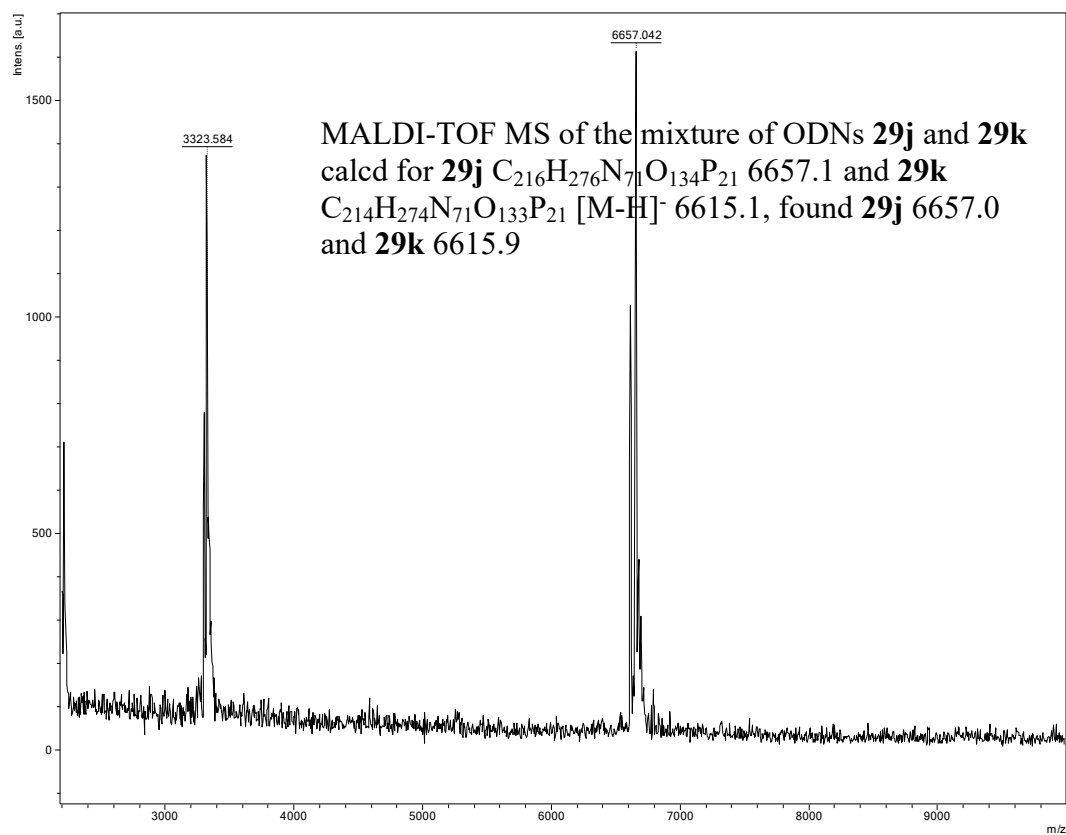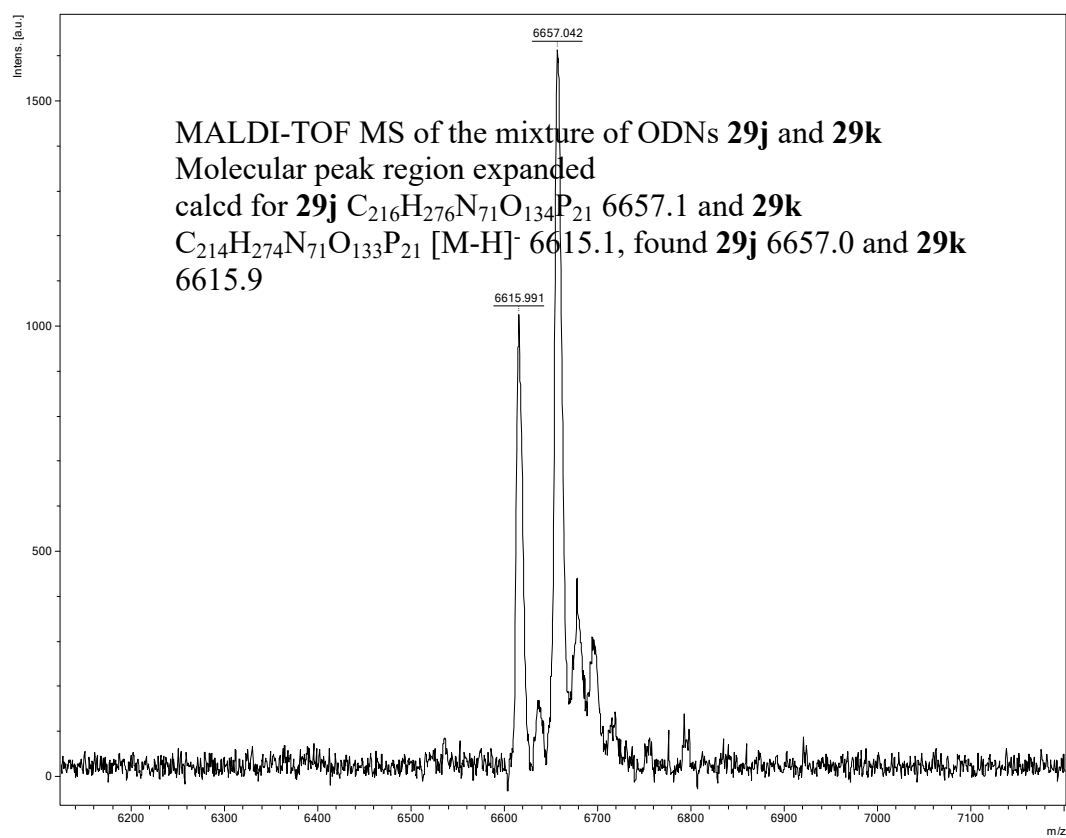



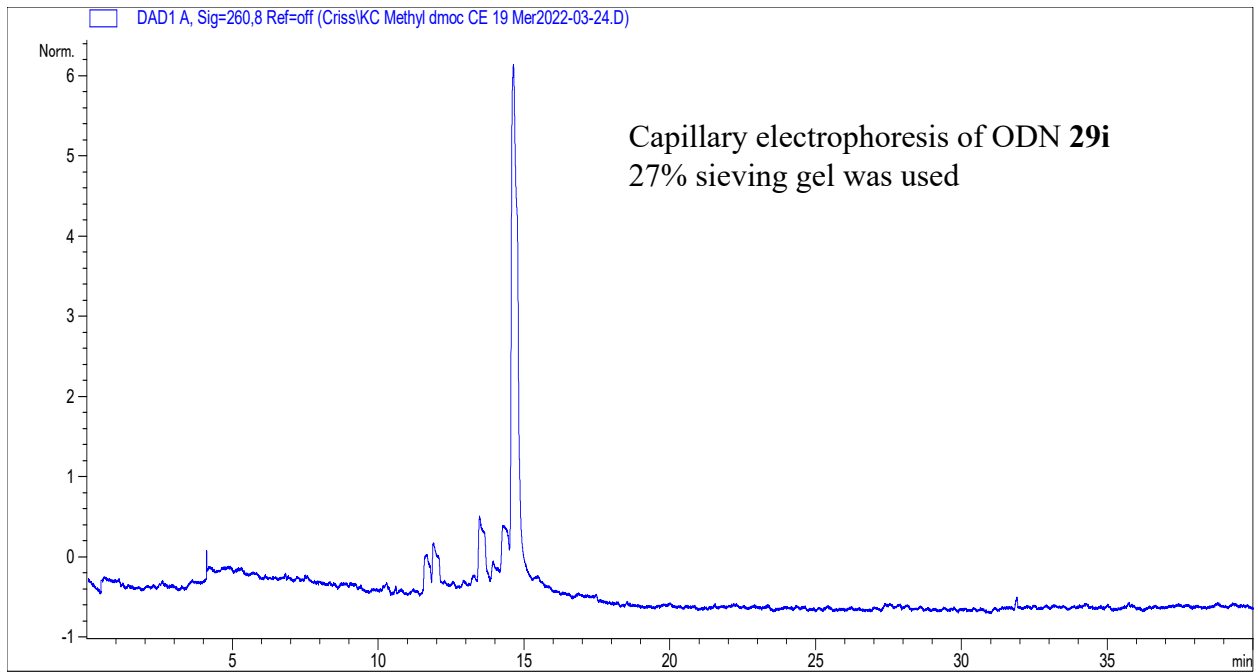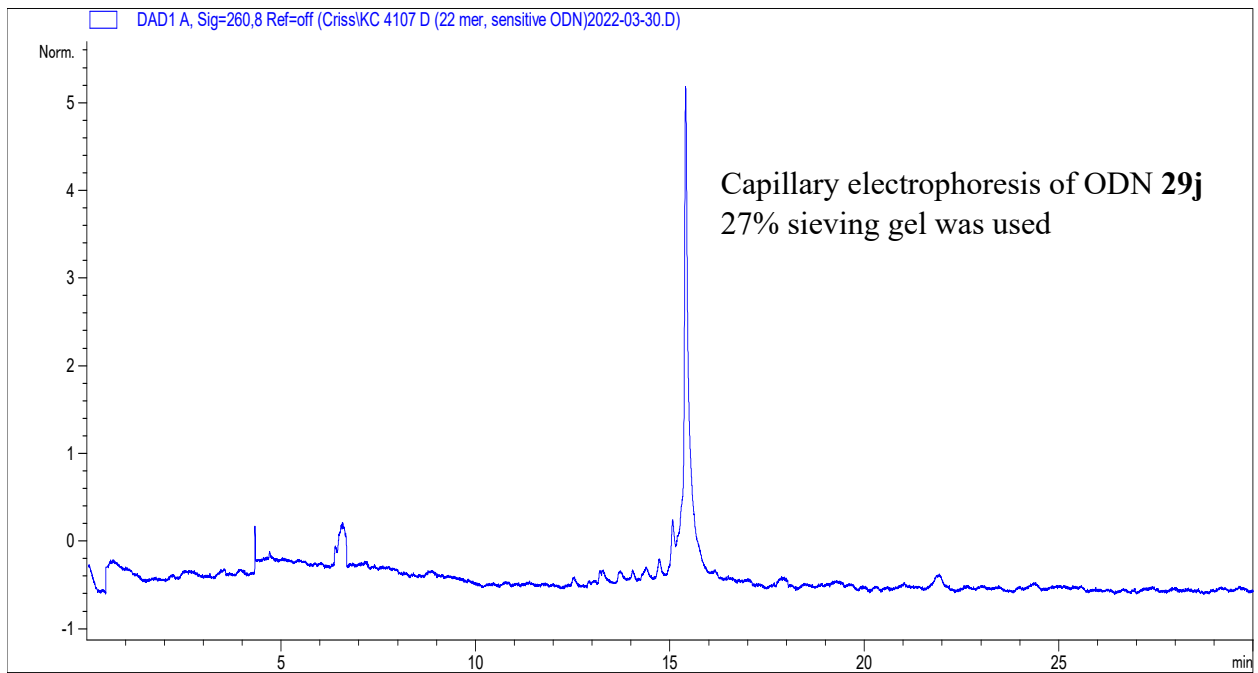

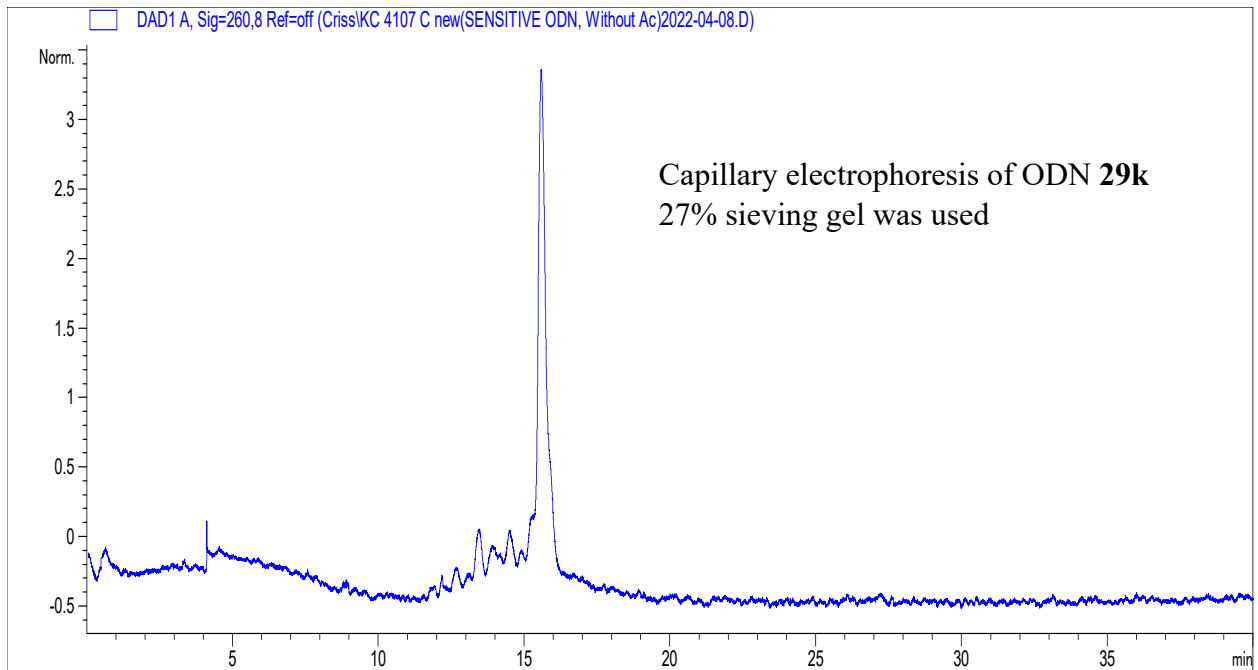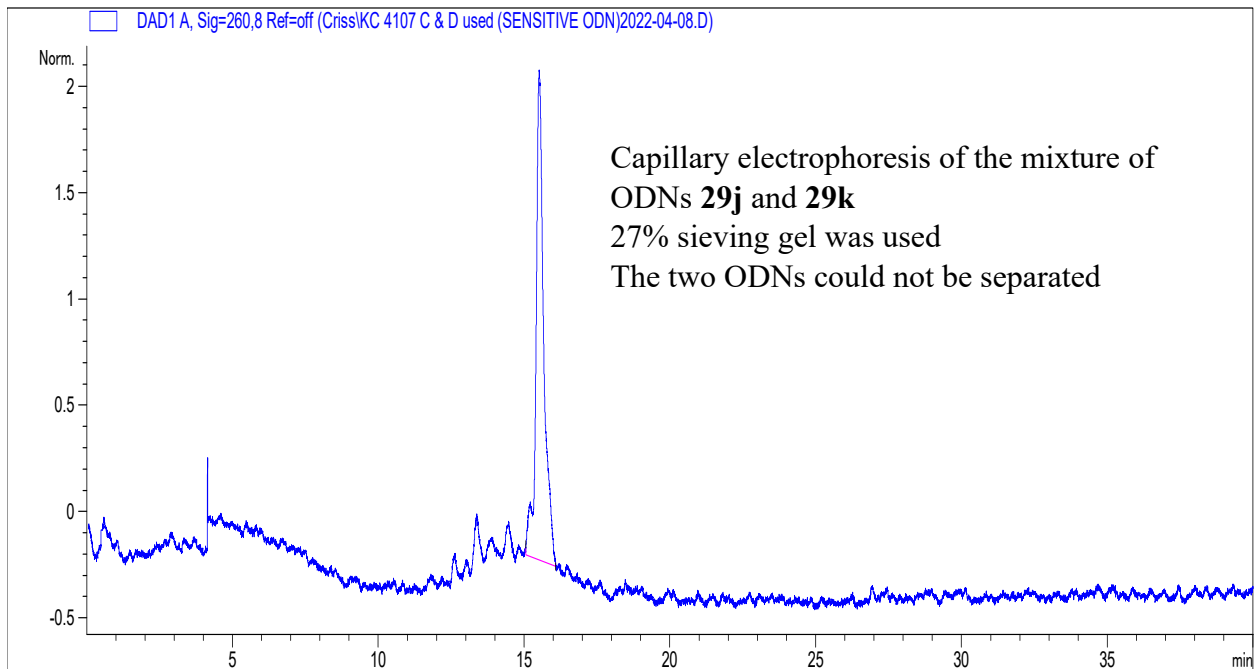

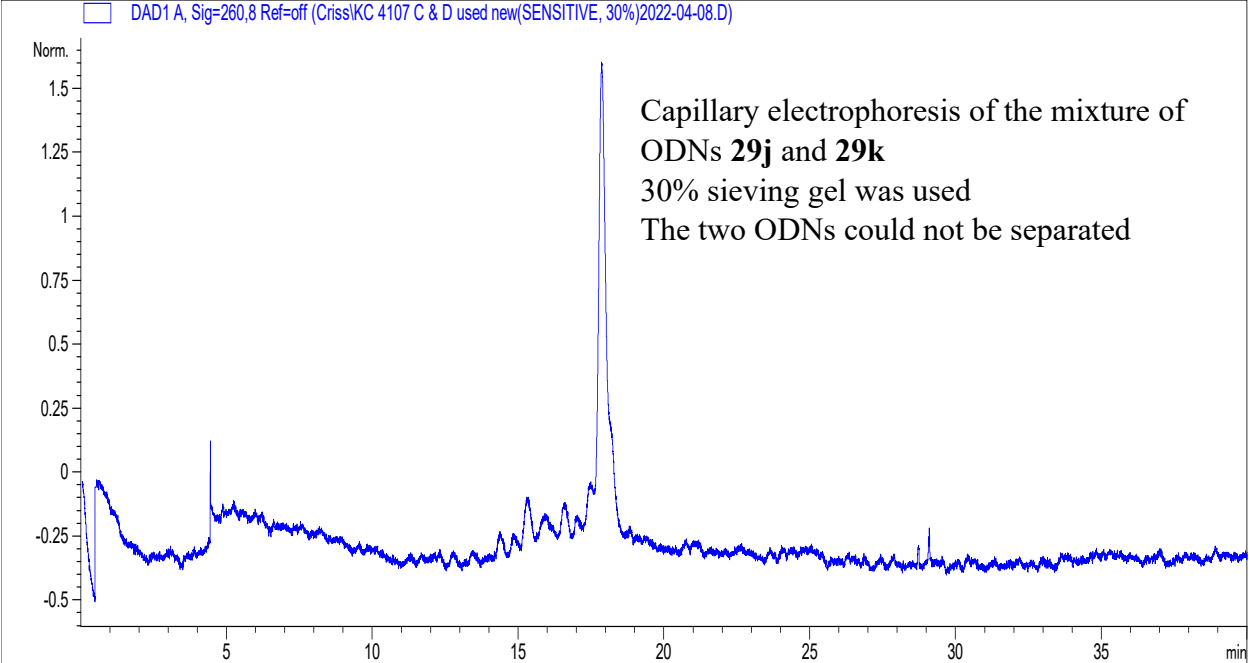

### An example trityl assay log of ODN synthesis

RUN NAME: KC 4107 (22 mer, Sensitive MD CE)

RUN DATE: 20220310 21:36:27

POSITION: COLUMN 1

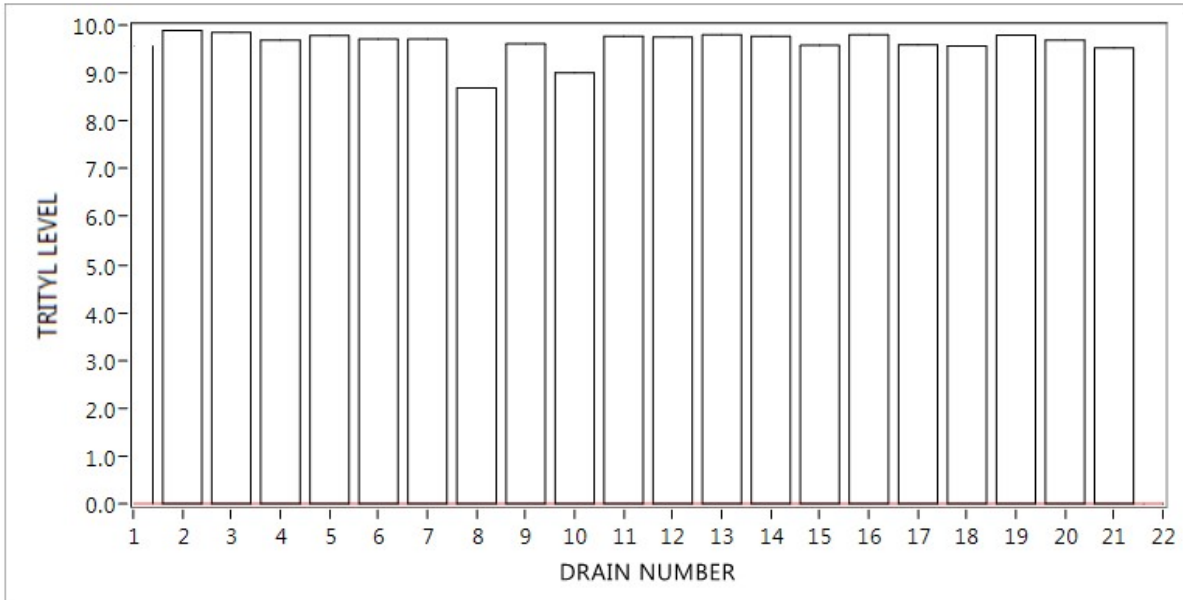

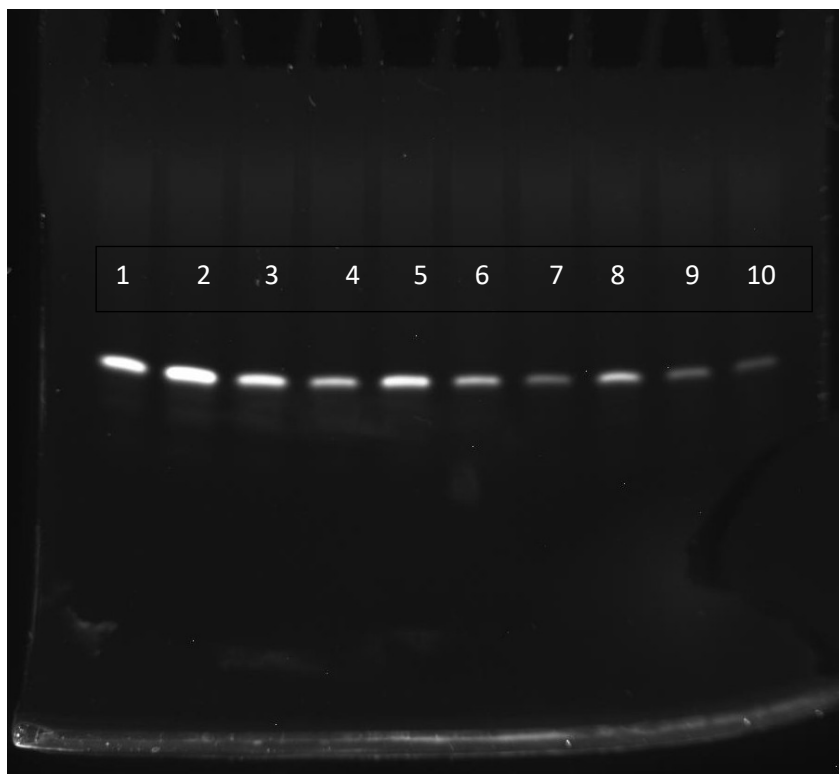

Image of denatured polyacrylamide gel electrophoresis analysis of ODN **29j** in comparison with **29k**. The two ODNs have the same sequence but **29j** has a 4acC modification while **29k** does not. Polyacrylamide gel (15%, 7 M urea), 1X TBE buffer, 190 V, 45 min, stained with Gel Red.

Lane 1: 48 ng **29j**. Lane 2: 48 ng **29j** and 46.5 ng **29k**. Lane 3: 46.5 ng **29k**.

Lane 4: 24 ng **29j**. Lane 5: 24 ng **29j** and 23.3 ng **29k**. Lane 6: 23.3 ng **29k**.

Lane 7: 12 ng **29j**. Lane 8: 12 ng **29j** and 11.6 ng **29k**. Lane 9: 11.6 ng **29k**.

Lane 10: 7.2 ng **29j**

Although the two ODNs could not be resolved, the single bands indicate that they do not contain any sequences that are shorter or longer than them. In addition, as presented in other parts of the paper, MALDI MS indicates that **29j** contains the 4acC modification while **29k** does not (Figure 4). Considering these and other evidences, which include CE and HPLC analyses, presented in the paper, **29j** is pure.
